# Supplementary material
Source: publisher figshare collection journal article supplement (https://gsajournals.figshare.com/ndownloader/files/15265190)
Supplement: Supplementary file 1 [file 15265190]

**A reference genome sequence for silver fir: a community genomics resource**

Elena Mosca, Fernando Cruz, Jèssica Gómez-Garrido, Luca Bianco, Christian Rellstab, Sabine Brodbeck, Katalin Csilléry, Bruno Fady, Matthias Fladung, Barbara Fussi, Dušan Gömöry, Santiago C. González-Martínez, Delphine Grivet, Marta Gut, Ole Kim Hansen, Katrin Heer, Zeki Kaya, Konstantin V. Krutovsky, Birgit Kersten, Sascha Liepelt, Eric Bazin, Lars Opgenoorth, Christoph Sperisen, Kristian K. Ullrich, Giovanni G. Vendramin, Marjana Westergren, Birgit Ziegenhagen, Tyler Alioto, Felix Gugerli, Berthold Heinze, Maria Höhn, Michela Troggio, David B. Neale

**Appendix 1**

**Information on the species**

Silver fir can live up to 500–600 years and reach up to 60 m in height (Wolf, 2003). Its distribution (Fig. S1) ranges from the Pyrenees to the Alps and towards the Carpathians, with the easternmost range edge in the Eastern Carpathians. It is also present in the mountains of the Balkan Penninsula, where it co-occurs with its presumed hybrid *A. borisii-regis*. Its northern distribution reaches northern Poland (up to 140 m asl.) and in the south the Appennines (up to 1950 m asl.) and Corsica (Debreczy and Rácz 2011). This species plays an important ecological role, since it increases forest biodiversity and reduces forest susceptibility to abiotic stresses, such as snow and wind (Dobrowolska *et al.* 2017). On lower elevations, silver fir is associated mostly with beech, but forms mixed stands with *P. abies* at higher elevations (Ellenberg 1988). In the Eastern Carpathians, delicate mixed stands of beech-fir-spruce are known (Doniță *et al.* 2005).

Silver fir has a deep root system and is hence less susceptible than other coniferous species to environmental impacts such as drought and storms in northern parts of its range, but may suffer from drought conditions in the southern parts of the range. Its relevance for European forestry is both historical and economic. Overharvesting in silver fir forests is one of the main reasons for its disappearance in several areas (Vrška *et al.* 2009), together with the ungulate browsing (Senn and Suter 2003; Häsler and Senn 2012). Moreover, during the period of forest dieback during the 1970s and 1980s, silver fir was the most susceptible species to abiotic stressors, such as SO2 pollution and climate change (Mauri *et al.* 2016).

The economic importance of silver fir is related to its wood that is used for pulpwood, construction, and for the extraction of antioxidant resin from the bark and needles included in several medicinal and cosmetic products (Mauri *et al.* 2016). Finally, the most widespread use of silver fir is in the form of Christmas trees.

**Appendix 2**

**Biogeographic situation of the sequenced tree AA_WSL01.**

1. **Summary**

The objective of this Appendix is to evaluate the origin of the sequenced *Abies alba* tree AA_WSL01 in the context of other Swiss silver fir stands. We used published, principally supposedly neutral, SNPs (Csilléry *et al.* 2018) from 19 Swiss silver fir populations and AA_WSL01 to assess population structure. We conclude that AA_WSL01 clusters with neighboring populations from the Swiss plateau, thus can likely be considered allochthonous.

1. **Materials and methods**

We used data from Csilléry at al. (2018), who genotyped 387 adult trees from 19 putatively autochthonous silver fir populations across the Swiss Alps, Pre-Alps, Central Plateau and Jura Mountains (Fig S2A). Samples were genotyped at 374 supposedly neutral single-nucleotide polymorphisms (SNPs) loci described in Csilléry *et al.* (2018). Briefly, 245 SNPs originate from transcriptome sequencing of 13 *A. alba* trees (Roschanski *et al.*, 2016) and 129 SNPs from amplicon sequencing in 12 *A. alba* trees using primers originally developed for *Pinus taeda* (Mosca *et al.*, 2012). DNA extraction and genotyping were performed using the all-inclusive service from LGC Genomics (Middlesex, United Kingdom). Here, we additionally genotyped AA_WSL01 using the same SNPs.

We used the Bayesian clustering algorithm implemented in Structure v.2.3.4 with the admixture model with correlated allele frequencies to assess population structure (Falush *et al.*, 2003). We estimated the prior population allele frequency parameter (λ) from the data using K = 1 to avoid non-identifiability issues with the other hyper-parameters (λ, α, F). λ was consistently around 0.65 across ten repeated runs. K values from 1 to 10 were tested using ten independent Markov chains for each K, 500,000 burn-in iterations and 500,000 iterations for estimation of the membership coefficients. Different numbers of clusters (K) were compared with Structure Harvester (Earl and vonHoldt, 2012) using the LnPr(X|K). Admixture coefficients were averaged across ten repeated runs using CLUMPP v.1.1.2 (Jakobsson and Rosenberg, 2007) using the Greedy algorithm for any K > 3 and large-K-Greedy for K > 5.

1. **Results**

The AA_WSL_01 genotype used for the Structure analysis is reported in Table S2B, and SNP data from the 19 population is publicly available on Dryad Repository. K=3 and 4 were the most supported numbers of clusters (Fig. S2B). At K=3, AA_WSL01 shared ancestry with two of the clusters, and at K=4, AA_WSL01 shared ancestry with three of the clusters. At both K values, the results suggest that AA_WSL01 is very close to other populations of the Swiss Plateau (such as VWD, BEI, SIG, VAZ) and the Jura mountains (COR, BRS), but also to geographically close Alpine populations such as MUO (Fig. S2A, C).

**References**

Csilléry, K., Ovaskainen, O., Sperisen, C., Widmer, A., Gugerli, F. 2018 Adaptation to local climate in a multi-trait space: evidence from silver fir (*Abies alba* Mill.) populations across a heterogeneous environment. *bioRxiv*, doi 10.1101/292540

Debreczy, Z., and Racz, I. 2011 Conifers Around the World. Budapest: Dendropress Ltd.

Dobrowolska, D., Bončina, A., and Klumpp, R. 2017 Ecology and silviculture of silver fir (*Abies alba* Mill.): a review. *Jornal of ForestResearch*, *22*, 326–335.

Doniță, N., Popescu, A., Paucă – Comănescu, M., Mihăilescu, S., Biriș, I. A. 2005 Habitatele din România — București. Romania: Editura Tehnică Silvică. pp. 496.

Earl, D. A., vonHoldt, B. M. 2012 STRUCTURE HARVESTER: a website and program for visualizing STRUCTURE output and implementing the Evanno method. *Conservation Genetics Resources*, *4*, 359–361.

Ellenberg, H. 1988 Vegetation Ecology of Central Europe. 4th Ed. 731 p. Cambridge University Press

EUFORGEN 2009 Distribution map of Silver fir (*Abies alba*).

Falush, D., Stephens M., Pritchard J. K. 2003 Inference of population structure using multilocus genotype data: linked loci and correlated allele frequencies. *Genetics, 164*, 1567–1587.

Häsler, H., and Senn, J. 2012 Ungulate browsing on European silver fir *Abies alba*: the role of occasions, food shortage and diet preferences. *Wildlife Biology*, *18*, 67-74.

Jakobsson, M., and Rosenberg, N. A. 2007 CLUMPP: a cluster matching and permutation program for dealing with label switching and multimodality in analysis of population structure. *Bioinformatics*, *23*, 1801–1806.

Mauri, A., de Rigo, D., and Caudullo, G. 2016 *Abies alba* in Europe: distribution, habitat, usage and threats. In: San-Miguel-Ayanz, J., de Rigo, D., Caudullo, G., Houston, Durrant, T., and Mauri, A. (Eds.). European Atlas of forest tree species. Luxembourg.

Mosca, E., Eckert, A. J., Di Pierro, E. A., Rocchini, D., La Porta, N., *et al.* 2012 The geographical and environmental determinants of genetic diversity for four alpine conifers of the European Alps. *Molecular Ecology*, *21,* 5530–5545.

Roschanski, A. M., Csilléry, K., Liepelt, S., Oddou-Muratorio, S., Ziegenhagen, B., *et al.* 2016 Evidence of divergent selection for drought and cold tolerance at landscape and local scales in *Abies alba* Mill. in the French Mediterranean Alps. *Molecular Ecology*, *25*, 776–794.

Senn, J., and Suter, W. 2003 Ungulate browsing on silver fir (*Abies alba*) in the Swiss Alps: beliefs in search of supporting data. [Forest Ecology and Management](https://www.sciencedirect.com/science/journal/03781127" \t "Go to Forest Ecology and Management on ScienceDirect)*,**181*, 151-164.

**Table S1** Estimation of DNA concentration, 260/280, and 260/230 ratios in the two sample types (megagametophyte and needle) used for DNA extraction in *A. alba*.

| **Sample type** | **Project code** | **Sample no.** | **Volume (µL)** | **Elution buffer** | **DNA concentration**  **(ng/µL)** | **Total amount DNA (µg)** | **Optical density** | |
| --- | --- | --- | --- | --- | --- | --- | --- | --- |
| **260/280** | **260/230** |
| Megagametophyte (Haploid) | AD 1913 | 34 | 90 | AMP | 41 | 3.7 | 1.83 | 1.75 |
| Needles  (diploid) | AD 4467 | N78 | 180 | Water | 136 | 24.5 | 1.85 | 2.40 |

**Table S2** **A:** Multi-locus genotypes of the megagametophyte and needle tissue used for sequencing. Samples were genotyped with 11 nuclear microsatellite markers (Hansen *et al.* 2005; Cremer *et al.* 2006). The genotyping confirms the expected haploid nature of the DNA isolated from the megagametophyte. NA – not available due to PCR failure; but the homozygote genotype in the diploid tissue anyway precludes the option for detecting potential contamination by maternal tissue based on this locus. **B**: The genotype of AA_WSL_01 for the SNP loci that were used in the STRUCTURE analysis in Appendix 2.

**A**

|  | **Sample name**  **Project code** |  | **Megagametophyte** | **Needles** |
| --- | --- | --- | --- | --- |
|  |  | AA_WSL01_34 | AA_WSL01_N78 |
|  |  | AD1913 | AD4467 |
| **Source** | **Microsatellite marker** |  | **Genotype** | **Genotype** |
| Hansen *et al.* 2005 | NFF3 |  | 134 | 134/138 |
|  | NFF7 |  | 147 | 123/147 |
|  | NFH15 |  | 134 | 112/134 |
|  | NFH3 |  | 110 | 110/110 |
| Cremer *et al.* 2006 | SF1 |  | 221 | 221/221 |
|  | SF239 |  | NA | 111/111 |
|  | SF324 |  | 112 | 112/112 |
|  | SF333 |  | 168 | 168/168 |
|  | SFb4 |  | 171 | 171/177 |
|  | SFb5 |  | 153 | 145/153 |
|  | SFg6 |  | 108 | 108/108 |

**B**

| **Loci** | **WSL_01** | **loci** | **WSL_01** | **loci** | **WSL_01** | **Loci** | **WSL_01** |
| --- | --- | --- | --- | --- | --- | --- | --- |
| contig00241.160 | TA | contig12900.345 | GA | newcontig06676.165 | AA | contig12333_118 | CC |
| contig00241.545 | CC | contig14101.217 | GG | newcontig07067.53 | TT | contig12938_304 | GG |
| contig00509.93 | GG | contig14310.698 | CC | newcontig08200.613 | AA | contig13019_57 | CC |
| contig00509.192 | GG | contig14310.800 | GC | newcontig08206.176 | CC | contig15281_496 | GG |
| contig00509.276 | TT | contig14409.108 | GG | newcontig08206.228 | CC | contig15564_209 | CC |
| contig00628.351 | -- | contig14455.150 | CC | newcontig09373.367 | CC | contig17134_378 | TT |
| contig00716.196 | TT | contig14514.32 | AA | newcontig14455.916 | -- | contig18208_169 | AA |
| contig00716.781 | AA | contig14514.173 | AA | newcontig14455.953 | GC | contig19020_93 | TG |
| contig00945.39 | CC | contig14580.627 | GA | newcontig15452.813 | TT | contig19263_523 | CC |
| contig01054.57 | GG | contig14580.865 | TG | newcontig15944.276 | AA | contig21414_507 | TT |
| contig01054.311 | AA | contig14580.898 | TT | newcontig15944.288 | CC | contig23896_89 | GG |
| contig01113.563 | GA | contig14623.303 | CC | newcontig16430.504 | GG | contig26346_103 | TC |
| contig01131.462 | CC | contig14680.261 | TC | newcontig18465.35 | TG | contig26970_540 | GG |
| contig01131.558 | CC | contig14887.561 | CC | newcontig18465.747 | AA | contig26978_283 | TT |
| contig01260.41 | TT | contig14887.690 | TT | newcontig18762.199 | TT | contig26995_100 | TA |
| contig01260.267 | -- | contig14915.331 | GG | newcontig20680.343 | CC | contig28201_160 | GA |
| contig01455.168 | CC | contig15076.316 | AA | newcontig25086.1240 | CC | X0_14221_01.Abal.563 | GA |
| contig01455.289 | TT | contig15135.372 | TT | newcontig26572.464 | TC | X2_5668_01.Abal.203 | TT |
| contig01468.274 | CC | contig15135.468 | TC | newcontig26602.432 | TT | CL1760Contig1_01-Abal-341 | -- |
| contig01468.511 | TT | contig15196.256 | TT | newcontig26602.585 | TT | CL3321Contig1_03-Abal-74 | -- |
| contig01505.255 | GC | contig15256.139 | TG | newcontig30715.525 | -- | 0_13552_02-Abal-65 | -- |
| contig01515.204 | GG | contig15256.604 | TA | newcontig30715.591 | GG | 0_9383_01-Abal-170 | AA |
| contig02019.588 | CC | contig15256.660 | AA | X0_366_02.Abal.263 | CT | CL4354Contig1_01-Abal-147 | -- |
| contig02088.183 | -- | contig15337.1228 | AA | UMN_1072_01.Abal.90 | CC | 2_8852_01-Abal-61 | -- |
| contig02088.255 | TT | contig15484.628 | CC | CL1455Contig1_06.Abal.287 | CC | UMN_4091_02-Abal-90 | -- |
| contig02108.136 | TC | contig15484.1095 | TC | X2_4554_02.Abal.87 | AA | 0_13552_02-Abal-380 | -- |
| contig02161.64 | GC | contig15596.559 | TC | X2_10014_01.Abal.294 | CC | 0_6259_01-Abal-415 | -- |
| contig02161.199 | GG | contig15596.973 | TA | X0_9383_01.Abal.270 | CC | 0_10754_01-Abal-156 | AA |
| contig02190.239 | GG | contig15727.126 | -- | CL4511Contig1_02.Abal.267 | AA | 0_11980_01-Abal-470 | -- |
| contig02190.265 | GG | contig15808.829 | -- | X0_10054_01.Abal.350 | TT | 0_18296_01-Abal-357 | TT |
| contig02315.161 | TT | contig16125.123 | -- | CL1664Contig1_02.Abal.377 | TT | 2_4554_02-Abal-393 | -- |
| contig02315.209 | GA | contig16157.1183 | CC | UMN_495_01.Abal.219 | TA | CL4354Contig1_01-Abal-202 | GG |
| contig02387.318 | TT | contig16332.419 | TG | X2_6491_01.Abal.306 | -- | 2_6457_01-Abal-341 | -- |
| contig02467.785 | CC | contig16356.332 | TT | CL1019Contig1_01.Abal.176 | AA | 0_13552_02-Abal-210 | -- |
| contig02495.3490 | TT | contig16411.197 | TA | X0_1116_02.Abal.196 | GA | 0_12254_01-Abal-209 | -- |
| contig02522.65 | TT | contig16454.169 | CC | CL1692Contig1_05.Abal.78 | CC | 0_11772_01-Abal-248 | -- |
| contig02522.282 | -- | contig16454.530 | GG | X0_15639_01.Abal.431 | CT | 2_6906_01-Abal-201 | -- |
| contig02676.395 | TG | contig16727.97 | CC | X0_1688_02.Abal.119 | GC | CL1045Contig1_01-Abal-553 | -- |
| contig02831.313 | AA | contig16756.89 | CC | CL516Contig1_07.Abal.290 | CC | UMN_6426_02-Abal-221 | -- |
| contig02937.405 | CC | contig16774.460 | TT | CL4578Contig1_02.Abal.376 | CC | 2_2937_01-Abal-145 | -- |
| contig02937.651 | TT | contig16822.456 | TC | CL4481Contig1_04.Abal.177 | CC | 0_14221_01-Abal-530 | -- |
| contig02986.110 | CC | contig16884.60 | -- | CL4255Contig1_03.Abal.591 | TT | 0_1116_02-Abal-436 | -- |
| contig02986.147 | TT | contig17066.1291 | GG | X2_10216_01.Abal.323 | AA | 0_439_02-Abal-347 | -- |
| contig02986.327 | AA | contig17540.195 | TT | X0_12745_01.Abal.286 | GG | CL4796Contig1_02-Abal-65 | -- |
| contig03380.79 | AA | contig17776.918 | GG | X0_15639_01.Abal.115 | GT | 0_14883_01-Abal-71 | -- |
| contig03600.120 | GG | contig17813.275 | -- | X0_7321_01.Abal.175 | GT | 0_7321_01-Abal-433 | -- |
| contig03689.670 | CC | contig17813.614 | TT | CL4284Contig1_01.Abal.167 | AA | 2_4554_02-Abal-167 | -- |
| contig03765.215 | CA | contig18067.318 | CC | X2_9291_02.Abal.84 | GG | 0_846_01-Abal-225 | -- |
| contig03803.208 | TT | contig18067.471 | TT | X2_9291_02.Abal.474 | GA | 0_18296_01-Abal-235 | -- |
| contig03908.414 | GG | contig18599.280 | AA | X2_6313_01.Abal.160 | -- | 0_8187_02-Abal-298 | -- |
| contig03942.73 | TG | contig18599.772 | CC | X0_1688_02.Abal.349 | TT | 0_1439_01-Abal-89 | -- |
| contig03942.88 | TT | contig18599.823 | TT | X2_10014_01.Abal.352 | CC | UMN_6874_01-Abal-840 | -- |
| contig04018.876 | GG | contig18676.31 | CC | X2_9328_01.Abal.204 | GC | CL1104Contig1_03-Abal-275 | -- |
| contig04538.344 | TC | contig18676.73 | CC | X0_13552_02.Abal.427 | CC | 1_6493_01-Abal-226 | -- |
| contig04538.470 | GG | contig18676.245 | -- | CL1524Contig1_03.Abal.318 | GG | CL305Contig1_05-Abal-91 | -- |
| contig04911.323 | AA | contig19054.28 | CC | UMN_4904_01.Abal.488 | TT | CL1694Contig1_04-Abal-136 | GG |
| contig05004.249 | TC | contig19143.561 | CC | CL149Contig3_04.Abal.190 | -- | 0_439_02-Abal-66 | GG |
| contig05004.671 | CC | contig19173.551 | GA | X0_12978_02.Abal.93 | TT | 2_6317_01-Abal-143 | -- |
| contig05234.288 | GG | contig19173.687 | TT | X0_12978_02.Abal.378 | -- | 0_7009_01-Abal-320 | -- |
| contig05234.297 | AA | contig19448.291 | GA | X0_17215_01.Abal.131 | GA | CL3116Contig1_03-Abal-118 | -- |
| contig05306.661 | TT | contig19448.666 | AA | X0_9457_01.Abal.323 | TT | 2_9465_01-Abal-288 | -- |
| contig05566.56 | -- | contig19448.1212 | CC | X0_12254_01.Abal.264 | TT | 0_7009_01-Abal-212 | -- |
| contig05566.130 | GG | contig20156.322 | -- | UMN_5867_01.Abal.81 | GT | CL149Contig3_04-Abal-73 | -- |
| contig05566.481 | AA | contig20694.92 | CC | UMN_1072_01.Abal.145 | TT | 0_7808_02-Abal-86 | -- |
| contig05603.139 | GA | contig20694.312 | TT | UMN_1023_01.Abal.126 | TT | 2_6317_01-Abal-173 | -- |
| contig05700.204 | TC | contig20694.1090 | TT | CL1104Contig1_03.Abal.99 | CC | CL2332Contig1_01-Abal-307 | -- |
| contig06119.125 | -- | contig21136.630 | -- | X2_8554_01.Abal.168 | GC | 2_8852_01-Abal-284 | -- |
| contig06331.174 | CC | contig21141.311 | AA | X0_18619_01.Abal.281 | GG | 0_15639_01-Abal-139 | -- |
| contig06331.178 | AA | contig21141.489 | GG | X0_4105_01.Abal.404 | GA | 2_9930_01-Abal-268 | CC |
| contig06757.46 | GG | contig23190.627 | AA | X0_14221_01.Abal.394 | GA | CL1430Contig1_06-Abal-257 | -- |
| contig06757.154 | -- | contig23660.685 | CC | CL3116Contig1_03.Abal.238 | CC | CL1455Contig1_06-Abal-152 | -- |
| contig06968.51 | -- | contig23982.493 | -- | X0_12156_02.Abal.255 | CC | 2_1818_01-Abal-128 | -- |
| contig07082.263 | AA | contig23982.774 | CC | CL1815Contig1_01.Abal.154 | GG | 2_7918_01-Abal-304 | -- |
| contig07082.314 | TG | contig24145.82 | CC | X2_7918_01.Abal.149 | -- | 0_13828_01-Abal-773 | -- |
| contig07150.658 | TT | contig24318.117 | GA | X0_1116_02.Abal.577 | TT | CL866Contig1_01-Abal-69 | GG |
| contig07377.148 | TG | contig24318.148 | CC | X2_6457_01.Abal.91 | AA | 1_6493_01-Abal-259 | -- |
| contig07377.313 | CC | contig24902.128 | CC | X0_439_02.Abal.193 | CC | 2_6317_01-Abal-399 | -- |
| contig08092.366 | AA | contig24902.464 | AA | X2_5668_01.Abal.66 | GG | 2_4123_02-Abal-138 | TT |
| contig08213.487 | GG | contig24902.466 | CC | CL1064Contig1_02.Abal.243 | -- | CL4481Contig1_04-Abal-123 | -- |
| contig08213.555 | CA | contig25386.792 | -- | X2_6317_01.Abal.66 | TA |  |  |
| contig08248.183 | GA | contig26089.361 | TT | X0_7321_01.Abal.629 | TA |  |  |
| contig08248.345 | -- | contig26457.409 | TT | X0_13828_01.Abal.121 | GA |  |  |
| contig08255.1089 | TT | contig26764.484 | TT | UMN_4804_01.Abal.199 | CT |  |  |
| contig08583.375 | TC | contig27000.1448 | -- | CL1524Contig1_03.Abal.224 | GG |  |  |
| contig08649.617 | AA | contig31121.47 | GG | X0_15252_01.Abal.187 | TT |  |  |
| contig08759.481 | -- | newcontig00251.177 | GG | X0_10054_01.Abal.215 | CT |  |  |
| contig08815.372 | TT | newcontig00575.206 | GG | X2_8554_01.Abal.110 | CT |  |  |
| contig08855.98 | CA | newcontig00575.232 | CC | X2_9328_01.Abal.373 | TT |  |  |
| contig08855.137 | CC | newcontig01181.201 | CC | X0_744_01.Abal.92 | TT |  |  |
| contig09065.715 | TC | newcontig01181.592 | TT | contig00407_192 | -- |  |  |
| contig09197.63 | TT | newcontig01181.99 | GG | contig02867_71 | AA |  |  |
| contig09263.403 | TC | newcontig03196.56 | TT | contig03708_115 | -- |  |  |
| contig09373.263 | GG | newcontig04814.189 | AA | contig04065_474 | CC |  |  |
| contig10568.280 | TT | newcontig05181.2450 | TT | contig07045_104 | CC |  |  |
| contig10976.962 | CC | newcontig05330.74 | CC | contig07410_465 | TC |  |  |
| contig11291.1965 | -- | newcontig05502.128 | AA | contig08674_621 | TC |  |  |
| contig11291.4439 | GC | newcontig05502.167 | CC | contig08852_137 | TT |  |  |
| contig12124.943 | TT | newcontig05945.417 | GG | contig10772_104 | CC |  |  |
| contig12178.207 | -- | newcontig05945.426 | -- | contig12207_690 | GA |  |  |

**Table S3** Gene ontology (GO) term categories used to count the GO terms of *A. alba*. GO_slim2 is an option in CateGOrize software and myclass2 accounts for 50 additional categories.

| **GO_TERM_categories** | **slim2** | **myclass2** |
| --- | --- | --- |
| GO:0000003 | reproduction | reproduction |
| GO:0000004 | biological process unknown | biological process unknown |
| GO:0000166 | nucleotide binding | nucleotide binding |
| GO:0000228 | nuclear chromosome | nuclear chromosome |
| GO:0000229 | cytoplasmic chromosome | cytoplasmic chromosome |
| GO:0003676 | nucleic acid binding | nucleic acid binding |
| GO:0003677 | DNA binding | DNA binding |
| GO:0003682 | chromatin binding | chromatin binding |
| GO:0003700 | transcription factor activity | transcription factor activity |
| GO:0003723 | RNA binding | RNA binding |
| GO:0003774 | motor activity | motor activity |
| GO:0003779 | actin binding | actin binding |
| GO:0003824 | catalytic activity | catalytic activity |
| GO:0004518 | nuclease activity | nuclease activity |
| GO:0004672 | protein kinase activity | protein kinase activity |
| GO:0004721 | phosphoprotein phosphatase activity | phosphoprotein phosphatase activity |
| GO:0004871 | signal transducer activity | signal transducer activity |
| GO:0004872 | receptor activity | receptor activity |
| GO:0005102 | receptor binding | receptor binding |
| GO:0005198 | structural molecule activity | structural molecule activity |
| GO:0005215 | transporter activity | transporter activity |
| GO:0005216 | ion channel activity | ion channel activity |
| GO:0005326 | neurotransmitter transporter activity | neurotransmitter transporter activity |
| GO:0005488 | binding | binding |
| GO:0005489 | electron transporter activity | electron transporter activity |
| GO:0005509 | calcium ion binding | calcium ion binding |
| GO:0005515 | protein binding | protein binding |
| GO:0005525 | NA | GTP binding |
| GO:0005554 | molecular function unknown | molecular function unknown |
| GO:0005576 | extracellular region | extracellular region |
| GO:0005578 | extracellular matrix (sensu Metazoa) | extracellular matrix (sensu Metazoa) |
| GO:0005615 | extracellular space | extracellular space |
| GO:0005618 | cell wall | cell wall |
| GO:0005622 | intracellular | intracellular |
| GO:0005623 | cell | cell |
| GO:0005634 | nucleus | nucleus |
| GO:0005635 | nuclear membrane | nuclear membrane |
| GO:0005654 | nucleoplasm | nucleoplasm |
| GO:0005694 | chromosome | chromosome |
| GO:0005730 | nucleolus | nucleolus |
| GO:0005737 | cytoplasm | cytoplasm |
| GO:0005739 | mitochondrion | mitochondrion |
| GO:0005764 | lysosome | lysosome |
| GO:0005768 | endosome | endosome |
| GO:0005773 | vacuole | vacuole |
| GO:0005777 | peroxisome | peroxisome |
| GO:0005783 | endoplasmic reticulum | endoplasmic reticulum |
| GO:0005794 | Golgi apparatus | Golgi apparatus |
| GO:0005811 | lipid particle | lipid particle |
| GO:0005815 | microtubule organizing center | microtubule organizing center |
| GO:0005829 | cytosol | cytosol |
| GO:0005840 | ribosome | ribosome |
| GO:0005856 | cytoskeleton | cytoskeleton |
| GO:0005886 | plasma membrane | plasma membrane |
| GO:0005929 | cilium | cilium |
| GO:0005941 | unlocalized protein complex | unlocalized protein complex |
| GO:0005975 | carbohydrate metabolism | carbohydrate metabolism |
| GO:0005992 | NA | trehalose biosynthetic process |
| GO:0006091 | generation of precursor metabolites and energy | generation of precursor metabolites and energy |
| GO:0006118 | electron transport | electron transport |
| GO:0006139 | nucleobase, nucleoside, nucleotide and nucleic acid metabolism | nucleobase, nucleoside, nucleotide and nucleic acid metabolism |
| GO:0006259 | DNA metabolism | DNA metabolism |
| GO:0006284 | NA | base-excision repair |
| GO:0006350 | transcription | transcription |
| GO:0006351 | NA | transcription, DNA-templated |
| GO:0006355 | NA | regulation of transcription, DNA-templated |
| GO:0006412 | protein biosynthesis | protein biosynthesis |
| GO:0006464 | protein modification | protein modification |
| GO:0006511 | NA | ubiquitin-dependent protein catabolic process |
| GO:0006519 | amino acid and derivative metabolism | amino acid and derivative metabolism |
| GO:0006629 | lipid metabolic process | lipid metabolic process |
| GO:0006810 | transport | transport |
| GO:0006811 | ion transport | ion transport |
| GO:0006886 | NA | intracellular protein transport |
| GO:0006887 | NA | exocytosis |
| GO:0006950 | response to stress | response to stress |
| GO:0006996 | organelle organization and biogenesis | organelle organization and biogenesis |
| GO:0007005 | mitochondrion organization and biogenesis | mitochondrion organization and biogenesis |
| GO:0007010 | cytoskeleton organization and biogenesis | cytoskeleton organization and biogenesis |
| GO:0007028 | cytoplasm organization and biogenesis | cytoplasm organization and biogenesis |
| GO:0007049 | cell cycle | cell cycle |
| GO:0007050 | NA | cell cycle arrest |
| GO:0007154 | cell communication | cell communication |
| GO:0007165 | signal transduction | signal transduction |
| GO:0007267 | cell-cell signaling | cell-cell signaling |
| GO:0007275 | multicellular organism development | multicellular organism development |
| GO:0007582 | physiological process | physiological process |
| GO:0007610 | behavior | behavior |
| GO:0008037 | cell recognition | cell recognition |
| GO:0008092 | cytoskeletal protein binding | cytoskeletal protein binding |
| GO:0008135 | translation factor activity, nucleic acid binding | translation factor activity, nucleic acid binding |
| GO:0008152 | metabolism | metabolism |
| GO:0008219 | cell death | cell death |
| GO:0008233 | peptidase activity | peptidase activity |
| GO:0008272 | NA | sulfate transport |
| GO:0008283 | cell proliferation | cell proliferation |
| GO:0008289 | lipid binding | lipid binding |
| GO:0008372 | cellular component unknown | cellular component unknown |
| GO:0009056 | catabolism | catabolism |
| GO:0009058 | biosynthesis | biosynthesis |
| GO:0009112 | NA | nucleobase metabolic process |
| GO:0009266 | NA | response to temperature stimulus |
| GO:0009409 | NA | response to cold |
| GO:0009416 | NA | response to light stimulus |
| GO:0009517 | NA | PSII associated light-harvesting complex II |
| GO:0009518 | NA | PSI associated light-harvesting complex I |
| GO:0009521 | NA | photosystem |
| GO:0009536 | plastid | plastid |
| GO:0009579 | thylakoid | thylakoid |
| GO:0009605 | response to external stimulus | response to external stimulus |
| GO:0009607 | response to biotic stimulus | response to biotic stimulus |
| GO:0009628 | response to abiotic stimulus | response to abiotic stimulus |
| GO:0009637 | NA | response to blu light |
| GO:0009640 | NA | photomorphogenesis |
| GO:0009642 | NA | response to light intensity |
| GO:0009653 | morphogenesis | morphogenesis |
| GO:0009698 | NA | phenylpropanoid metabolic process |
| GO:0009719 | response to endogenous stimulus | response to endogenous stimulus |
| GO:0009725 | NA | response to hormone |
| GO:0009790 | embryonic development | embryonic development |
| GO:0009793 | NA | embryo development ending in seed dormancy |
| GO:0009819 | NA | drought recovery |
| GO:0009866 | NA | induced systemic resistance, ethylene mediated signaling pathway |
| GO:0010011 | NA | auxin binding |
| GO:0010114 | NA | response to red light |
| GO:0015031 | protein transport | protein transport |
| GO:0015693 | NA | magnesium ion transport |
| GO:0015986 | NA | ATP synthesis coupled proton transport. |
| GO:0016023 | cytoplasmic membrane-bound vesicle | cytoplasmic membrane-bound vesicle |
| GO:0016032 | viral life cycle | viral life cycle |
| GO:0016043 | cell organization and biogenesis | cell organization and biogenesis |
| GO:0016049 | cell growth | cell growth |
| GO:0016114 | NA | terpenoid biosynthetic process |
| GO:0016137 | NA | glycoside metabolic process |
| GO:0016192 | NA | vesicle-mediated transport |
| GO:0016209 | antioxidant activity | antioxidant activity |
| GO:0016265 | death | death |
| GO:0016301 | kinase activity | kinase activity |
| GO:0016491 | NA | oxidoreductase activity |
| GO:0016567 | NA | protein ubiquitination |
| GO:0016740 | transferase activity | transferase activity |
| GO:0016787 | hydrolase activity | hydrolase activity |
| GO:0019538 | protein metabolism | protein metabolism |
| GO:0019725 | cell homeostasis | cell homeostasis |
| GO:0019748 | secondary metabolism | secondary metabolism |
| GO:0019825 | oxygen binding | oxygen binding |
| GO:0022414 | NA | reproductive process |
| GO:0030154 | cell differentiation | cell differentiation |
| GO:0030188 | chaperone regulator activity | chaperone regulator activity |
| GO:0030234 | enzyme regulator activity | enzyme regulator activity |
| GO:0030246 | carbohydrate binding | carbohydrate binding |
| GO:0030312 | external encapsulating structure | external encapsulating structure |
| GO:0030313 | cell envelope | cell envelope |
| GO:0030528 | transcription regulator activity | transcription regulator activity |
| GO:0030533 | triplet codon-amino acid adaptor activity | triplet codon-amino acid adaptor activity |
| GO:0031047 | NA | gene silencing by RNA |
| GO:0032880 | NA | regulation of protein location |
| GO:0040007 | growth | growth |
| GO:0040029 | regulation of gene expression, epigenetic | regulation of gene expression, epigenetic |
| GO:0042633 | NA | cellular response to water deprivation |
| GO:0043631 | NA | RNA polyadenylation |
| GO:0044248 | NA | cellular catabolic process |
| GO:0045182 | translation regulator activity | translation regulator activity |
| GO:0045454 | NA | cell redox homeostasis |
| GO:0045735 | nutrient reservoir activity | nutrient reservoir activity |
| GO:0046836 | NA | glycolipid transport |
| GO:0048518 | NA | positive regulation of biological process |
| GO:0048583 | NA | regulation of response to stimulus |
| GO:0051119 | NA | sugar transmembrane transporter activity |
| GO:0050826 | NA | response to freezing |
| GO:0055114 | NA | oxidation-reduction process |
| GO:0060918 | NA | auxin transport |
| GO:0070417 | NA | cellular response to cold |
| GO:0071482 | NA | cellular response to light stimulus |
| GO:0080032 | NA | methyl jasmonate esterase activity |
| GO:0080123 | NA | jasmonate-amino synthetase activity |
| GO:1901656 | NA | glycoside transport |
| GO:1903416 | NA | response to glycoside |

**Table S4** *A. alba* genome annotation statistics considering two types of gene models (protein coding genes and full-length genes).

| **Gene model** | **Statistics** | **Number** | **Min (bp)** | **Max (bp)** | **Mean (bp)** | **Sum (bp)** |
| --- | --- | --- | --- | --- | --- | --- |
| Protein-coding | Gene | 94,205 | 150 | 38,779 | 908 | 85,583,185 |
|  | Transcript | 98,227 | 138 | 10206 | 634 | 62,279,333 |
|  | Exon | 187,740 | 3 | 6735 | 320 | 60,123,247 |
|  | Intron | 89,618 | 23 | 36,015 | 327 | 29,295,866 |
| Full-length | Gene | 50,757 | 150 | 38,779 | 1190 | 60,407,725 |
|  | Transcript | 53,487 | 138 | 10,206 | 807 | 43,157,666 |
|  | Exon | 118,168 | 3 | 6300 | 352 | 41,576,958 |
|  | Intron | 64,728 | 23 | 36,015 | 330 | 21,374,812 |

**Table S5** Intron (**A**) and exon (**B**) statistics for Silver fir (*A. alba*) and Douglas-fir (*Pseudotsuga menziesii*) gene models.

A

| **Species** | **Gene model** | **N introns** | **Mean length** | **Max intron length** | **Introns/gene** |
| --- | --- | --- | --- | --- | --- |
| *A. alba* | protein-coding genes | 89,618 | 327 | 36,015 | 0.95 |
|  | full-length | 64,728 | 330 | 36,015 | 1.31 |
| *P. menziesii* | High quality | 145,595 | 2,304 | 182,834 | 4.25 |
|  | High quality full-length | 81,477 | 2,566 | 182,831 | 3.95 |

B

| **Species** | **Gene model** | **N exons** | **Mean length** | **Max exon length** | **Exons/gene** |
| --- | --- | --- | --- | --- | --- |
| *A. alba* | protein coding genes | 187,740 | 320 | 6,735 | 1.99 |
|  | full-lenght | 118,168 | 352 | 6,300 | 2.33 |
| *P. menziesii* | High quality | 181,475 | 231 | 8,037 | 5.06 |
|  | High quality full-lenght | 103,734 | 247 | 8,037 | 3.65 |

Counts are provided for two categories of classified models based on quality and completeness.

**Table S6** Count and percentage (fraction) of the GO terms assigned in each category using the two classification lists (**A**: slim2 and **B**: myclass2) to be complemented.

A

| **GO Class ID** | **Definitions** | **Counts** | **Fractions** |
| --- | --- | --- | --- |
| [GO:0008152](http://amigo.geneontology.org/cgi-bin/amigo/go.cgi?action=query&view=details&search_constraint=terms&query=GO:0008152) | metabolism | [3077](../../../../../../../../javascript/ReverseDisplay('GO/0008152')) | 11.10% |
| [GO:0003824](http://amigo.geneontology.org/cgi-bin/amigo/go.cgi?action=query&view=details&search_constraint=terms&query=GO:0003824) | catalytic activity | [2127](../../../../../../../../javascript/ReverseDisplay('GO/0003824')) | 7.67% |
| [GO:0005623](http://amigo.geneontology.org/cgi-bin/amigo/go.cgi?action=query&view=details&search_constraint=terms&query=GO:0005623) | cell | [1312](../../../../../../../../javascript/ReverseDisplay('GO/0005623')) | 4.73% |
| [GO:0016043](http://amigo.geneontology.org/cgi-bin/amigo/go.cgi?action=query&view=details&search_constraint=terms&query=GO:0016043) | cell organization and biogenesis | [1312](../../../../../../../../javascript/ReverseDisplay('GO/0016043')) | 4.73% |
| [GO:0007275](http://amigo.geneontology.org/cgi-bin/amigo/go.cgi?action=query&view=details&search_constraint=terms&query=GO:0007275) | development | [1191](../../../../../../../../javascript/ReverseDisplay('GO/0007275')) | 4.30% |
| [GO:0005622](http://amigo.geneontology.org/cgi-bin/amigo/go.cgi?action=query&view=details&search_constraint=terms&query=GO:0005622) | intracellular | [1090](../../../../../../../../javascript/ReverseDisplay('GO/0005622')) | 3.93% |
| [GO:0009058](http://amigo.geneontology.org/cgi-bin/amigo/go.cgi?action=query&view=details&search_constraint=terms&query=GO:0009058) | biosynthesis | [1055](../../../../../../../../javascript/ReverseDisplay('GO/0009058')) | 3.81% |
| [GO:0006139](http://amigo.geneontology.org/cgi-bin/amigo/go.cgi?action=query&view=details&search_constraint=terms&query=GO:0006139) | nucleobase, nucleoside, nucleotide and nucleic acid metabolism | [985](../../../../../../../../javascript/ReverseDisplay('GO/0006139')) | 3.55% |
| [GO:0006810](http://amigo.geneontology.org/cgi-bin/amigo/go.cgi?action=query&view=details&search_constraint=terms&query=GO:0006810) | transport | [950](../../../../../../../../javascript/ReverseDisplay('GO/0006810')) | 3.43% |
| [GO:0016740](http://amigo.geneontology.org/cgi-bin/amigo/go.cgi?action=query&view=details&search_constraint=terms&query=GO:0016740) | transferase activity | [740](../../../../../../../../javascript/ReverseDisplay('GO/0016740')) | 2.67% |
| [GO:0005488](http://amigo.geneontology.org/cgi-bin/amigo/go.cgi?action=query&view=details&search_constraint=terms&query=GO:0005488) | binding | [730](../../../../../../../../javascript/ReverseDisplay('GO/0005488')) | 2.63% |
| [GO:0019538](http://amigo.geneontology.org/cgi-bin/amigo/go.cgi?action=query&view=details&search_constraint=terms&query=GO:0019538) | protein metabolism | [669](../../../../../../../../javascript/ReverseDisplay('GO/0019538')) | 2.41% |
| [GO:0007154](http://amigo.geneontology.org/cgi-bin/amigo/go.cgi?action=query&view=details&search_constraint=terms&query=GO:0007154) | cell communication | [630](../../../../../../../../javascript/ReverseDisplay('GO/0007154')) | 2.27% |
| [GO:0006996](http://amigo.geneontology.org/cgi-bin/amigo/go.cgi?action=query&view=details&search_constraint=terms&query=GO:0006996) | organelle organization and biogenesis | [619](../../../../../../../../javascript/ReverseDisplay('GO/0006996')) | 2.23% |
| [GO:0030154](http://amigo.geneontology.org/cgi-bin/amigo/go.cgi?action=query&view=details&search_constraint=terms&query=GO:0030154) | cell differentiation | [550](../../../../../../../../javascript/ReverseDisplay('GO/0030154')) | 1.98% |
| [GO:0016787](http://amigo.geneontology.org/cgi-bin/amigo/go.cgi?action=query&view=details&search_constraint=terms&query=GO:0016787) | hydrolase activity | [546](../../../../../../../../javascript/ReverseDisplay('GO/0016787')) | 1.97% |
| [GO:0006950](http://amigo.geneontology.org/cgi-bin/amigo/go.cgi?action=query&view=details&search_constraint=terms&query=GO:0006950) | response to stress | [535](../../../../../../../../javascript/ReverseDisplay('GO/0006950')) | 1.93% |
| [GO:0005737](http://amigo.geneontology.org/cgi-bin/amigo/go.cgi?action=query&view=details&search_constraint=terms&query=GO:0005737) | cytoplasm | [530](../../../../../../../../javascript/ReverseDisplay('GO/0005737')) | 1.91% |
| [GO:0007165](http://amigo.geneontology.org/cgi-bin/amigo/go.cgi?action=query&view=details&search_constraint=terms&query=GO:0007165) | signal transduction | [501](../../../../../../../../javascript/ReverseDisplay('GO/0007165')) | 1.81% |
| [GO:0009653](http://amigo.geneontology.org/cgi-bin/amigo/go.cgi?action=query&view=details&search_constraint=terms&query=GO:0009653) | morphogenesis | [498](../../../../../../../../javascript/ReverseDisplay('GO/0009653')) | 1.80% |
| [GO:0009056](http://amigo.geneontology.org/cgi-bin/amigo/go.cgi?action=query&view=details&search_constraint=terms&query=GO:0009056) | catabolism | [458](../../../../../../../../javascript/ReverseDisplay('GO/0009056')) | 1.65% |
| [GO:0000003](http://amigo.geneontology.org/cgi-bin/amigo/go.cgi?action=query&view=details&search_constraint=terms&query=GO:0000003) | reproduction | [440](../../../../../../../../javascript/ReverseDisplay('GO/0000003')) | 1.59% |
| [GO:0006464](http://amigo.geneontology.org/cgi-bin/amigo/go.cgi?action=query&view=details&search_constraint=terms&query=GO:0006464) | protein modification | [433](../../../../../../../../javascript/ReverseDisplay('GO/0006464')) | 1.56% |
| [GO:0005215](http://amigo.geneontology.org/cgi-bin/amigo/go.cgi?action=query&view=details&search_constraint=terms&query=GO:0005215) | transporter activity | [369](../../../../../../../../javascript/ReverseDisplay('GO/0005215')) | 1.33% |
| [GO:0006811](http://amigo.geneontology.org/cgi-bin/amigo/go.cgi?action=query&view=details&search_constraint=terms&query=GO:0006811) | ion transport | [341](../../../../../../../../javascript/ReverseDisplay('GO/0006811')) | 1.23% |
| [GO:0005515](http://amigo.geneontology.org/cgi-bin/amigo/go.cgi?action=query&view=details&search_constraint=terms&query=GO:0005515) | protein binding | [330](../../../../../../../../javascript/ReverseDisplay('GO/0005515')) | 1.19% |
| [GO:0007049](http://amigo.geneontology.org/cgi-bin/amigo/go.cgi?action=query&view=details&search_constraint=terms&query=GO:0007049) | cell cycle | [321](../../../../../../../../javascript/ReverseDisplay('GO/0007049')) | 1.16% |
| [GO:0006629](http://amigo.geneontology.org/cgi-bin/amigo/go.cgi?action=query&view=details&search_constraint=terms&query=GO:0006629) | lipid metabolism | [320](../../../../../../../../javascript/ReverseDisplay('GO/0006629')) | 1.15% |
| [GO:0005634](http://amigo.geneontology.org/cgi-bin/amigo/go.cgi?action=query&view=details&search_constraint=terms&query=GO:0005634) | nucleus | [279](../../../../../../../../javascript/ReverseDisplay('GO/0005634')) | 1.01% |
| [GO:0009605](http://amigo.geneontology.org/cgi-bin/amigo/go.cgi?action=query&view=details&search_constraint=terms&query=GO:0009605) | response to external stimulus | [270](../../../../../../../../javascript/ReverseDisplay('GO/0009605')) | 0.97% |
| [GO:0006259](http://amigo.geneontology.org/cgi-bin/amigo/go.cgi?action=query&view=details&search_constraint=terms&query=GO:0006259) | DNA metabolism | [254](../../../../../../../../javascript/ReverseDisplay('GO/0006259')) | 0.92% |
| [GO:0005975](http://amigo.geneontology.org/cgi-bin/amigo/go.cgi?action=query&view=details&search_constraint=terms&query=GO:0005975) | carbohydrate metabolism | [210](../../../../../../../../javascript/ReverseDisplay('GO/0005975')) | 0.76% |
| [GO:0009628](http://amigo.geneontology.org/cgi-bin/amigo/go.cgi?action=query&view=details&search_constraint=terms&query=GO:0009628) | response to abiotic stimulus | [198](../../../../../../../../javascript/ReverseDisplay('GO/0009628')) | 0.71% |
| [GO:0009719](http://amigo.geneontology.org/cgi-bin/amigo/go.cgi?action=query&view=details&search_constraint=terms&query=GO:0009719) | response to endogenous stimulus | [184](../../../../../../../../javascript/ReverseDisplay('GO/0009719')) | 0.66% |
| [GO:0008219](http://amigo.geneontology.org/cgi-bin/amigo/go.cgi?action=query&view=details&search_constraint=terms&query=GO:0008219) | cell death | [165](../../../../../../../../javascript/ReverseDisplay('GO/0008219')) | 0.60% |
| [GO:0003676](http://amigo.geneontology.org/cgi-bin/amigo/go.cgi?action=query&view=details&search_constraint=terms&query=GO:0003676) | nucleic acid binding | [162](../../../../../../../../javascript/ReverseDisplay('GO/0003676')) | 0.58% |
| [GO:0007010](http://amigo.geneontology.org/cgi-bin/amigo/go.cgi?action=query&view=details&search_constraint=terms&query=GO:0007010) | cytoskeleton organization and biogenesis | [158](../../../../../../../../javascript/ReverseDisplay('GO/0007010')) | 0.57% |
| [GO:0009790](http://amigo.geneontology.org/cgi-bin/amigo/go.cgi?action=query&view=details&search_constraint=terms&query=GO:0009790) | embryonic development | [155](../../../../../../../../javascript/ReverseDisplay('GO/0009790')) | 0.56% |
| [GO:0015031](http://amigo.geneontology.org/cgi-bin/amigo/go.cgi?action=query&view=details&search_constraint=terms&query=GO:0015031) | protein transport | [141](../../../../../../../../javascript/ReverseDisplay('GO/0015031')) | 0.51% |
| [GO:0016301](http://amigo.geneontology.org/cgi-bin/amigo/go.cgi?action=query&view=details&search_constraint=terms&query=GO:0016301) | kinase activity | [141](../../../../../../../../javascript/ReverseDisplay('GO/0016301')) | 0.51% |
| [GO:0040007](http://amigo.geneontology.org/cgi-bin/amigo/go.cgi?action=query&view=details&search_constraint=terms&query=GO:0040007) | growth | [136](../../../../../../../../javascript/ReverseDisplay('GO/0040007')) | 0.49% |
| [GO:0009607](http://amigo.geneontology.org/cgi-bin/amigo/go.cgi?action=query&view=details&search_constraint=terms&query=GO:0009607) | response to biotic stimulus | [115](../../../../../../../../javascript/ReverseDisplay('GO/0009607')) | 0.41% |
| [GO:0005694](http://amigo.geneontology.org/cgi-bin/amigo/go.cgi?action=query&view=details&search_constraint=terms&query=GO:0005694) | chromosome | [110](../../../../../../../../javascript/ReverseDisplay('GO/0005694')) | 0.40% |
| [GO:0005856](http://amigo.geneontology.org/cgi-bin/amigo/go.cgi?action=query&view=details&search_constraint=terms&query=GO:0005856) | cytoskeleton | [108](../../../../../../../../javascript/ReverseDisplay('GO/0005856')) | 0.39% |
| [GO:0007267](http://amigo.geneontology.org/cgi-bin/amigo/go.cgi?action=query&view=details&search_constraint=terms&query=GO:0007267) | cell-cell signaling | [98](../../../../../../../../javascript/ReverseDisplay('GO/0007267')) | 0.35% |
| [GO:0006412](http://amigo.geneontology.org/cgi-bin/amigo/go.cgi?action=query&view=details&search_constraint=terms&query=GO:0006412) | protein biosynthesis | [92](../../../../../../../../javascript/ReverseDisplay('GO/0006412')) | 0.33% |
| [GO:0003677](http://amigo.geneontology.org/cgi-bin/amigo/go.cgi?action=query&view=details&search_constraint=terms&query=GO:0003677) | DNA binding | [81](../../../../../../../../javascript/ReverseDisplay('GO/0003677')) | 0.29% |
| [GO:0019725](http://amigo.geneontology.org/cgi-bin/amigo/go.cgi?action=query&view=details&search_constraint=terms&query=GO:0019725) | cell homeostasis | [81](../../../../../../../../javascript/ReverseDisplay('GO/0019725')) | 0.29% |
| [GO:0019748](http://amigo.geneontology.org/cgi-bin/amigo/go.cgi?action=query&view=details&search_constraint=terms&query=GO:0019748) | secondary metabolism | [80](../../../../../../../../javascript/ReverseDisplay('GO/0019748')) | 0.29% |
| [GO:0007005](http://amigo.geneontology.org/cgi-bin/amigo/go.cgi?action=query&view=details&search_constraint=terms&query=GO:0007005) | mitochondrion organization and biogenesis | [78](../../../../../../../../javascript/ReverseDisplay('GO/0007005')) | 0.28% |
| [GO:0005886](http://amigo.geneontology.org/cgi-bin/amigo/go.cgi?action=query&view=details&search_constraint=terms&query=GO:0005886) | plasma membrane | [78](../../../../../../../../javascript/ReverseDisplay('GO/0005886')) | 0.28% |
| [GO:0005654](http://amigo.geneontology.org/cgi-bin/amigo/go.cgi?action=query&view=details&search_constraint=terms&query=GO:0005654) | nucleoplasm | [77](../../../../../../../../javascript/ReverseDisplay('GO/0005654')) | 0.28% |
| [GO:0008283](http://amigo.geneontology.org/cgi-bin/amigo/go.cgi?action=query&view=details&search_constraint=terms&query=GO:0008283) | cell proliferation | [77](../../../../../../../../javascript/ReverseDisplay('GO/0008283')) | 0.28% |
| [GO:0003723](http://amigo.geneontology.org/cgi-bin/amigo/go.cgi?action=query&view=details&search_constraint=terms&query=GO:0003723) | RNA binding | [74](../../../../../../../../javascript/ReverseDisplay('GO/0003723')) | 0.27% |
| [GO:0040029](http://amigo.geneontology.org/cgi-bin/amigo/go.cgi?action=query&view=details&search_constraint=terms&query=GO:0040029) | regulation of gene expression, epigenetic | [74](../../../../../../../../javascript/ReverseDisplay('GO/0040029')) | 0.27% |
| [GO:0016032](http://amigo.geneontology.org/cgi-bin/amigo/go.cgi?action=query&view=details&search_constraint=terms&query=GO:0016032) | viral life cycle | [70](../../../../../../../../javascript/ReverseDisplay('GO/0016032')) | 0.25% |
| [GO:0007610](http://amigo.geneontology.org/cgi-bin/amigo/go.cgi?action=query&view=details&search_constraint=terms&query=GO:0007610) | behavior | [69](../../../../../../../../javascript/ReverseDisplay('GO/0007610')) | 0.25% |
| [GO:0030234](http://amigo.geneontology.org/cgi-bin/amigo/go.cgi?action=query&view=details&search_constraint=terms&query=GO:0030234) | enzyme regulator activity | [67](../../../../../../../../javascript/ReverseDisplay('GO/0030234')) | 0.24% |
| [GO:0006091](http://amigo.geneontology.org/cgi-bin/amigo/go.cgi?action=query&view=details&search_constraint=terms&query=GO:0006091) | generation of precursor metabolites and energy | [65](../../../../../../../../javascript/ReverseDisplay('GO/0006091')) | 0.23% |
| [GO:0005102](http://amigo.geneontology.org/cgi-bin/amigo/go.cgi?action=query&view=details&search_constraint=terms&query=GO:0005102) | receptor binding | [65](../../../../../../../../javascript/ReverseDisplay('GO/0005102')) | 0.23% |
| [GO:0009536](http://amigo.geneontology.org/cgi-bin/amigo/go.cgi?action=query&view=details&search_constraint=terms&query=GO:0009536) | plastid | [58](../../../../../../../../javascript/ReverseDisplay('GO/0009536')) | 0.21% |
| [GO:0005739](http://amigo.geneontology.org/cgi-bin/amigo/go.cgi?action=query&view=details&search_constraint=terms&query=GO:0005739) | mitochondrion | [56](../../../../../../../../javascript/ReverseDisplay('GO/0005739')) | 0.20% |
| [GO:0004518](http://amigo.geneontology.org/cgi-bin/amigo/go.cgi?action=query&view=details&search_constraint=terms&query=GO:0004518) | nuclease activity | [52](../../../../../../../../javascript/ReverseDisplay('GO/0004518')) | 0.19% |
| [GO:0005783](http://amigo.geneontology.org/cgi-bin/amigo/go.cgi?action=query&view=details&search_constraint=terms&query=GO:0005783) | endoplasmic reticulum | [50](../../../../../../../../javascript/ReverseDisplay('GO/0005783')) | 0.18% |
| [GO:0000228](http://amigo.geneontology.org/cgi-bin/amigo/go.cgi?action=query&view=details&search_constraint=terms&query=GO:0000228) | nuclear chromosome | [48](../../../../../../../../javascript/ReverseDisplay('GO/0000228')) | 0.17% |
| [GO:0004672](http://amigo.geneontology.org/cgi-bin/amigo/go.cgi?action=query&view=details&search_constraint=terms&query=GO:0004672) | protein kinase activity | [47](../../../../../../../../javascript/ReverseDisplay('GO/0004672')) | 0.17% |
| [GO:0004871](http://amigo.geneontology.org/cgi-bin/amigo/go.cgi?action=query&view=details&search_constraint=terms&query=GO:0004871) | signal transducer activity | [44](../../../../../../../../javascript/ReverseDisplay('GO/0004871')) | 0.16% |
| [GO:0005773](http://amigo.geneontology.org/cgi-bin/amigo/go.cgi?action=query&view=details&search_constraint=terms&query=GO:0005773) | vacuole | [44](../../../../../../../../javascript/ReverseDisplay('GO/0005773')) | 0.16% |
| [GO:0016049](http://amigo.geneontology.org/cgi-bin/amigo/go.cgi?action=query&view=details&search_constraint=terms&query=GO:0016049) | cell growth | [43](../../../../../../../../javascript/ReverseDisplay('GO/0016049')) | 0.16% |
| [GO:0004872](http://amigo.geneontology.org/cgi-bin/amigo/go.cgi?action=query&view=details&search_constraint=terms&query=GO:0004872) | receptor activity | [42](../../../../../../../../javascript/ReverseDisplay('GO/0004872')) | 0.15% |
| [GO:0008233](http://amigo.geneontology.org/cgi-bin/amigo/go.cgi?action=query&view=details&search_constraint=terms&query=GO:0008233) | peptidase activity | [40](../../../../../../../../javascript/ReverseDisplay('GO/0008233')) | 0.14% |
| [GO:0008289](http://amigo.geneontology.org/cgi-bin/amigo/go.cgi?action=query&view=details&search_constraint=terms&query=GO:0008289) | lipid binding | [40](../../../../../../../../javascript/ReverseDisplay('GO/0008289')) | 0.14% |
| [GO:0000166](http://amigo.geneontology.org/cgi-bin/amigo/go.cgi?action=query&view=details&search_constraint=terms&query=GO:0000166) | nucleotide binding | [35](../../../../../../../../javascript/ReverseDisplay('GO/0000166')) | 0.13% |
| [GO:0009579](http://amigo.geneontology.org/cgi-bin/amigo/go.cgi?action=query&view=details&search_constraint=terms&query=GO:0009579) | thylakoid | [30](../../../../../../../../javascript/ReverseDisplay('GO/0009579')) | 0.11% |
| [GO:0008092](http://amigo.geneontology.org/cgi-bin/amigo/go.cgi?action=query&view=details&search_constraint=terms&query=GO:0008092) | cytoskeletal protein binding | [28](../../../../../../../../javascript/ReverseDisplay('GO/0008092')) | 0.10% |
| [GO:0005929](http://amigo.geneontology.org/cgi-bin/amigo/go.cgi?action=query&view=details&search_constraint=terms&query=GO:0005929) | cilium | [28](../../../../../../../../javascript/ReverseDisplay('GO/0005929')) | 0.10% |
| [GO:0005768](http://amigo.geneontology.org/cgi-bin/amigo/go.cgi?action=query&view=details&search_constraint=terms&query=GO:0005768) | endosome | [28](../../../../../../../../javascript/ReverseDisplay('GO/0005768')) | 0.10% |
| [GO:0005216](http://amigo.geneontology.org/cgi-bin/amigo/go.cgi?action=query&view=details&search_constraint=terms&query=GO:0005216) | ion channel activity | [27](../../../../../../../../javascript/ReverseDisplay('GO/0005216')) | 0.10% |
| [GO:0005794](http://amigo.geneontology.org/cgi-bin/amigo/go.cgi?action=query&view=details&search_constraint=terms&query=GO:0005794) | Golgi apparatus | [27](../../../../../../../../javascript/ReverseDisplay('GO/0005794')) | 0.10% |
| [GO:0005576](http://amigo.geneontology.org/cgi-bin/amigo/go.cgi?action=query&view=details&search_constraint=terms&query=GO:0005576) | extracellular region | [22](../../../../../../../../javascript/ReverseDisplay('GO/0005576')) | 0.08% |
| [GO:0005829](http://amigo.geneontology.org/cgi-bin/amigo/go.cgi?action=query&view=details&search_constraint=terms&query=GO:0005829) | cytosol | [22](../../../../../../../../javascript/ReverseDisplay('GO/0005829')) | 0.08% |
| [GO:0005815](http://amigo.geneontology.org/cgi-bin/amigo/go.cgi?action=query&view=details&search_constraint=terms&query=GO:0005815) | microtubule organizing center | [20](../../../../../../../../javascript/ReverseDisplay('GO/0005815')) | 0.07% |
| [GO:0005730](http://amigo.geneontology.org/cgi-bin/amigo/go.cgi?action=query&view=details&search_constraint=terms&query=GO:0005730) | nucleolus | [19](../../../../../../../../javascript/ReverseDisplay('GO/0005730')) | 0.07% |
| [GO:0004721](http://amigo.geneontology.org/cgi-bin/amigo/go.cgi?action=query&view=details&search_constraint=terms&query=GO:0004721) | phosphoprotein phosphatase activity | [16](../../../../../../../../javascript/ReverseDisplay('GO/0004721')) | 0.06% |
| [GO:0005764](http://amigo.geneontology.org/cgi-bin/amigo/go.cgi?action=query&view=details&search_constraint=terms&query=GO:0005764) | lysosome | [14](../../../../../../../../javascript/ReverseDisplay('GO/0005764')) | 0.05% |
| [GO:0016209](http://amigo.geneontology.org/cgi-bin/amigo/go.cgi?action=query&view=details&search_constraint=terms&query=GO:0016209) | antioxidant activity | [14](../../../../../../../../javascript/ReverseDisplay('GO/0016209')) | 0.05% |
| [GO:0003700](http://amigo.geneontology.org/cgi-bin/amigo/go.cgi?action=query&view=details&search_constraint=terms&query=GO:0003700) | transcription factor activity | [14](../../../../../../../../javascript/ReverseDisplay('GO/0003700')) | 0.05% |
| [GO:0005840](http://amigo.geneontology.org/cgi-bin/amigo/go.cgi?action=query&view=details&search_constraint=terms&query=GO:0005840) | ribosome | [13](../../../../../../../../javascript/ReverseDisplay('GO/0005840')) | 0.05% |
| [GO:0005635](http://amigo.geneontology.org/cgi-bin/amigo/go.cgi?action=query&view=details&search_constraint=terms&query=GO:0005635) | nuclear membrane | [12](../../../../../../../../javascript/ReverseDisplay('GO/0005635')) | 0.04% |
| [GO:0030246](http://amigo.geneontology.org/cgi-bin/amigo/go.cgi?action=query&view=details&search_constraint=terms&query=GO:0030246) | carbohydrate binding | [12](../../../../../../../../javascript/ReverseDisplay('GO/0030246')) | 0.04% |
| [GO:0030312](http://amigo.geneontology.org/cgi-bin/amigo/go.cgi?action=query&view=details&search_constraint=terms&query=GO:0030312) | external encapsulating structure | [11](../../../../../../../../javascript/ReverseDisplay('GO/0030312')) | 0.04% |
| [GO:0007028](http://amigo.geneontology.org/cgi-bin/amigo/go.cgi?action=query&view=details&search_constraint=terms&query=GO:0007028) | cytoplasm organization and biogenesis | [11](../../../../../../../../javascript/ReverseDisplay('GO/0007028')) | 0.04% |
| [GO:0005198](http://amigo.geneontology.org/cgi-bin/amigo/go.cgi?action=query&view=details&search_constraint=terms&query=GO:0005198) | structural molecule activity | [11](../../../../../../../../javascript/ReverseDisplay('GO/0005198')) | 0.04% |
| [GO:0005618](http://amigo.geneontology.org/cgi-bin/amigo/go.cgi?action=query&view=details&search_constraint=terms&query=GO:0005618) | cell wall | [10](../../../../../../../../javascript/ReverseDisplay('GO/0005618')) | 0.04% |
| [GO:0008037](http://amigo.geneontology.org/cgi-bin/amigo/go.cgi?action=query&view=details&search_constraint=terms&query=GO:0008037) | cell recognition | [8](../../../../../../../../javascript/ReverseDisplay('GO/0008037')) | 0.03% |
| [GO:0005777](http://amigo.geneontology.org/cgi-bin/amigo/go.cgi?action=query&view=details&search_constraint=terms&query=GO:0005777) | peroxisome | [8](../../../../../../../../javascript/ReverseDisplay('GO/0005777')) | 0.03% |
| [GO:0003682](http://amigo.geneontology.org/cgi-bin/amigo/go.cgi?action=query&view=details&search_constraint=terms&query=GO:0003682) | chromatin binding | [7](../../../../../../../../javascript/ReverseDisplay('GO/0003682')) | 0.03% |
| [GO:0003774](http://amigo.geneontology.org/cgi-bin/amigo/go.cgi?action=query&view=details&search_constraint=terms&query=GO:0003774) | motor activity | [6](../../../../../../../../javascript/ReverseDisplay('GO/0003774')) | 0.02% |
| [GO:0045182](http://amigo.geneontology.org/cgi-bin/amigo/go.cgi?action=query&view=details&search_constraint=terms&query=GO:0045182) | translation regulator activity | [6](../../../../../../../../javascript/ReverseDisplay('GO/0045182')) | 0.02% |
| [GO:0008135](http://amigo.geneontology.org/cgi-bin/amigo/go.cgi?action=query&view=details&search_constraint=terms&query=GO:0008135) | translation factor activity, nucleic acid binding | [6](../../../../../../../../javascript/ReverseDisplay('GO/0008135')) | 0.02% |
| [GO:0005615](http://amigo.geneontology.org/cgi-bin/amigo/go.cgi?action=query&view=details&search_constraint=terms&query=GO:0005615) | extracellular space | [4](../../../../../../../../javascript/ReverseDisplay('GO/0005615')) | 0.01% |
| [GO:0000229](http://amigo.geneontology.org/cgi-bin/amigo/go.cgi?action=query&view=details&search_constraint=terms&query=GO:0000229) | cytoplasmic chromosome | [4](../../../../../../../../javascript/ReverseDisplay('GO/0000229')) | 0.01% |
| [GO:0030313](http://amigo.geneontology.org/cgi-bin/amigo/go.cgi?action=query&view=details&search_constraint=terms&query=GO:0030313) | cell envelope | [3](../../../../../../../../javascript/ReverseDisplay('GO/0030313')) | 0.01% |
| [GO:0003779](http://amigo.geneontology.org/cgi-bin/amigo/go.cgi?action=query&view=details&search_constraint=terms&query=GO:0003779) | actin binding | [3](../../../../../../../../javascript/ReverseDisplay('GO/0003779')) | 0.01% |
| [GO:0005578](http://amigo.geneontology.org/cgi-bin/amigo/go.cgi?action=query&view=details&search_constraint=terms&query=GO:0005578) | extracellular matrix (sensu Metazoa) | [3](../../../../../../../../javascript/ReverseDisplay('GO/0005578')) | 0.01% |
| [GO:0005811](http://amigo.geneontology.org/cgi-bin/amigo/go.cgi?action=query&view=details&search_constraint=terms&query=GO:0005811) | lipid particle | [2](../../../../../../../../javascript/ReverseDisplay('GO/0005811')) | 0.01% |
| [GO:0006118](http://amigo.geneontology.org/cgi-bin/amigo/go.cgi?action=query&view=details&search_constraint=terms&query=GO:0006118) | electron transport | [1](../../../../../../../../javascript/ReverseDisplay('GO/0006118')) | 0.00% |
| [GO:0045735](http://amigo.geneontology.org/cgi-bin/amigo/go.cgi?action=query&view=details&search_constraint=terms&query=GO:0045735) | nutrient reservoir activity | [1](../../../../../../../../javascript/ReverseDisplay('GO/0045735')) | 0.00% |
| [GO:0019825](http://amigo.geneontology.org/cgi-bin/amigo/go.cgi?action=query&view=details&search_constraint=terms&query=GO:0019825) | oxygen binding | [1](../../../../../../../../javascript/ReverseDisplay('GO/0019825')) | 0.00% |
| [GO:0005509](http://amigo.geneontology.org/cgi-bin/amigo/go.cgi?action=query&view=details&search_constraint=terms&query=GO:0005509) | calcium ion binding | [1](../../../../../../../../javascript/ReverseDisplay('GO/0005509')) | 0.00% |
| **Total** | | 27723 | 100.00% |

B

| **GO Class ID** | **Definitions** | | **Counts** | **Fractions** |
| --- | --- | --- | --- | --- |
| [GO:0000003](http://amigo.geneontology.org/cgi-bin/amigo/go.cgi?action=query&view=details&search_constraint=terms&query=GO:0000003) | reproduction | | [440](../../../../../../../../javascript/ReverseDisplay('GO/0000003')) | 1.38% |
| [GO:0000166](http://amigo.geneontology.org/cgi-bin/amigo/go.cgi?action=query&view=details&search_constraint=terms&query=GO:0000166) | nucleotide binding | | [35](../../../../../../../../javascript/ReverseDisplay('GO/0000166')) | 0.11% |
| [GO:0000228](http://amigo.geneontology.org/cgi-bin/amigo/go.cgi?action=query&view=details&search_constraint=terms&query=GO:0000228) | nuclear chromosome | | [48](../../../../../../../../javascript/ReverseDisplay('GO/0000228')) | 0.15% |
| [GO:0000229](http://amigo.geneontology.org/cgi-bin/amigo/go.cgi?action=query&view=details&search_constraint=terms&query=GO:0000229) | cytoplasmic chromosome | | [4](../../../../../../../../javascript/ReverseDisplay('GO/0000229')) | 0.01% |
| [GO:0003676](http://amigo.geneontology.org/cgi-bin/amigo/go.cgi?action=query&view=details&search_constraint=terms&query=GO:0003676) | nucleic acid binding | | [162](../../../../../../../../javascript/ReverseDisplay('GO/0003676')) | 0.51% |
| [GO:0003677](http://amigo.geneontology.org/cgi-bin/amigo/go.cgi?action=query&view=details&search_constraint=terms&query=GO:0003677) | DNA binding | | [81](../../../../../../../../javascript/ReverseDisplay('GO/0003677')) | 0.25% |
| [GO:0003682](http://amigo.geneontology.org/cgi-bin/amigo/go.cgi?action=query&view=details&search_constraint=terms&query=GO:0003682) | chromatin binding | | [7](../../../../../../../../javascript/ReverseDisplay('GO/0003682')) | 0.02% |
| [GO:0003700](http://amigo.geneontology.org/cgi-bin/amigo/go.cgi?action=query&view=details&search_constraint=terms&query=GO:0003700) | transcription factor activity | | [14](../../../../../../../../javascript/ReverseDisplay('GO/0003700')) | 0.04% |
| [GO:0003723](http://amigo.geneontology.org/cgi-bin/amigo/go.cgi?action=query&view=details&search_constraint=terms&query=GO:0003723) | RNA binding | | [74](../../../../../../../../javascript/ReverseDisplay('GO/0003723')) | 0.23% |
| [GO:0003774](http://amigo.geneontology.org/cgi-bin/amigo/go.cgi?action=query&view=details&search_constraint=terms&query=GO:0003774) | motor activity | | [6](../../../../../../../../javascript/ReverseDisplay('GO/0003774')) | 0.02% |
| [GO:0003779](http://amigo.geneontology.org/cgi-bin/amigo/go.cgi?action=query&view=details&search_constraint=terms&query=GO:0003779) | actin binding | | [3](../../../../../../../../javascript/ReverseDisplay('GO/0003779')) | 0.01% |
| [GO:0003824](http://amigo.geneontology.org/cgi-bin/amigo/go.cgi?action=query&view=details&search_constraint=terms&query=GO:0003824) | catalytic activity | | [2127](../../../../../../../../javascript/ReverseDisplay('GO/0003824')) | 6.68% |
| [GO:0004518](http://amigo.geneontology.org/cgi-bin/amigo/go.cgi?action=query&view=details&search_constraint=terms&query=GO:0004518) | nuclease activity | | [52](../../../../../../../../javascript/ReverseDisplay('GO/0004518')) | 0.16% |
| [GO:0004672](http://amigo.geneontology.org/cgi-bin/amigo/go.cgi?action=query&view=details&search_constraint=terms&query=GO:0004672) | protein kinase activity | | [47](../../../../../../../../javascript/ReverseDisplay('GO/0004672')) | 0.15% |
| [GO:0004721](http://amigo.geneontology.org/cgi-bin/amigo/go.cgi?action=query&view=details&search_constraint=terms&query=GO:0004721) | phosphoprotein phosphatase activity | | [16](../../../../../../../../javascript/ReverseDisplay('GO/0004721')) | 0.05% |
| [GO:0004871](http://amigo.geneontology.org/cgi-bin/amigo/go.cgi?action=query&view=details&search_constraint=terms&query=GO:0004871) | signal transducer activity | | [44](../../../../../../../../javascript/ReverseDisplay('GO/0004871')) | 0.14% |
| [GO:0004872](http://amigo.geneontology.org/cgi-bin/amigo/go.cgi?action=query&view=details&search_constraint=terms&query=GO:0004872) | receptor activity | | [42](../../../../../../../../javascript/ReverseDisplay('GO/0004872')) | 0.13% |
| [GO:0005102](http://amigo.geneontology.org/cgi-bin/amigo/go.cgi?action=query&view=details&search_constraint=terms&query=GO:0005102) | receptor binding | | [65](../../../../../../../../javascript/ReverseDisplay('GO/0005102')) | 0.20% |
| [GO:0005198](http://amigo.geneontology.org/cgi-bin/amigo/go.cgi?action=query&view=details&search_constraint=terms&query=GO:0005198) | structural molecule activity | | [11](../../../../../../../../javascript/ReverseDisplay('GO/0005198')) | 0.03% |
| [GO:0005215](http://amigo.geneontology.org/cgi-bin/amigo/go.cgi?action=query&view=details&search_constraint=terms&query=GO:0005215) | transporter activity | | [369](../../../../../../../../javascript/ReverseDisplay('GO/0005215')) | 1.16% |
| [GO:0005216](http://amigo.geneontology.org/cgi-bin/amigo/go.cgi?action=query&view=details&search_constraint=terms&query=GO:0005216) | ion channel activity | | [27](../../../../../../../../javascript/ReverseDisplay('GO/0005216')) | 0.08% |
| [GO:0005488](http://amigo.geneontology.org/cgi-bin/amigo/go.cgi?action=query&view=details&search_constraint=terms&query=GO:0005488) | binding | | [730](../../../../../../../../javascript/ReverseDisplay('GO/0005488')) | 2.29% |
| [GO:0005509](http://amigo.geneontology.org/cgi-bin/amigo/go.cgi?action=query&view=details&search_constraint=terms&query=GO:0005509) | calcium ion binding | | [1](../../../../../../../../javascript/ReverseDisplay('GO/0005509')) | 0.00% |
| [GO:0005515](http://amigo.geneontology.org/cgi-bin/amigo/go.cgi?action=query&view=details&search_constraint=terms&query=GO:0005515) | protein binding | | [330](../../../../../../../../javascript/ReverseDisplay('GO/0005515')) | 1.04% |
| [GO:0005525](http://amigo.geneontology.org/cgi-bin/amigo/go.cgi?action=query&view=details&search_constraint=terms&query=GO:0005525) | GTP binding | | [1](../../../../../../../../javascript/ReverseDisplay('GO/0005525')) | 0.00% |
| [GO:0005576](http://amigo.geneontology.org/cgi-bin/amigo/go.cgi?action=query&view=details&search_constraint=terms&query=GO:0005576) | extracellular region | | [22](../../../../../../../../javascript/ReverseDisplay('GO/0005576')) | 0.07% |
| [GO:0005578](http://amigo.geneontology.org/cgi-bin/amigo/go.cgi?action=query&view=details&search_constraint=terms&query=GO:0005578) | extracellular matrix (sensu Metazoa) | | [3](../../../../../../../../javascript/ReverseDisplay('GO/0005578')) | 0.01% |
| [GO:0005615](http://amigo.geneontology.org/cgi-bin/amigo/go.cgi?action=query&view=details&search_constraint=terms&query=GO:0005615) | extracellular space | | [4](../../../../../../../../javascript/ReverseDisplay('GO/0005615')) | 0.01% |
| [GO:0005618](http://amigo.geneontology.org/cgi-bin/amigo/go.cgi?action=query&view=details&search_constraint=terms&query=GO:0005618) | cell wall | | [10](../../../../../../../../javascript/ReverseDisplay('GO/0005618')) | 0.03% |
| [GO:0005622](http://amigo.geneontology.org/cgi-bin/amigo/go.cgi?action=query&view=details&search_constraint=terms&query=GO:0005622) | intracellular | | [1090](../../../../../../../../javascript/ReverseDisplay('GO/0005622')) | 3.42% |
| [GO:0005623](http://amigo.geneontology.org/cgi-bin/amigo/go.cgi?action=query&view=details&search_constraint=terms&query=GO:0005623) | cell | | [1312](../../../../../../../../javascript/ReverseDisplay('GO/0005623')) | 4.12% |
| [GO:0005634](http://amigo.geneontology.org/cgi-bin/amigo/go.cgi?action=query&view=details&search_constraint=terms&query=GO:0005634) | nucleus | | [279](../../../../../../../../javascript/ReverseDisplay('GO/0005634')) | 0.88% |
| [GO:0005635](http://amigo.geneontology.org/cgi-bin/amigo/go.cgi?action=query&view=details&search_constraint=terms&query=GO:0005635) | nuclear membrane | | [12](../../../../../../../../javascript/ReverseDisplay('GO/0005635')) | 0.04% |
| [GO:0005654](http://amigo.geneontology.org/cgi-bin/amigo/go.cgi?action=query&view=details&search_constraint=terms&query=GO:0005654) | nucleoplasm | | [77](../../../../../../../../javascript/ReverseDisplay('GO/0005654')) | 0.24% |
| [GO:0005694](http://amigo.geneontology.org/cgi-bin/amigo/go.cgi?action=query&view=details&search_constraint=terms&query=GO:0005694) | chromosome | | [110](../../../../../../../../javascript/ReverseDisplay('GO/0005694')) | 0.35% |
| [GO:0005730](http://amigo.geneontology.org/cgi-bin/amigo/go.cgi?action=query&view=details&search_constraint=terms&query=GO:0005730) | nucleolus | | [19](../../../../../../../../javascript/ReverseDisplay('GO/0005730')) | 0.06% |
| [GO:0005737](http://amigo.geneontology.org/cgi-bin/amigo/go.cgi?action=query&view=details&search_constraint=terms&query=GO:0005737) | cytoplasm | | [530](../../../../../../../../javascript/ReverseDisplay('GO/0005737')) | 1.66% |
| [GO:0005739](http://amigo.geneontology.org/cgi-bin/amigo/go.cgi?action=query&view=details&search_constraint=terms&query=GO:0005739) | mitochondrion | | [56](../../../../../../../../javascript/ReverseDisplay('GO/0005739')) | 0.18% |
| [GO:0005764](http://amigo.geneontology.org/cgi-bin/amigo/go.cgi?action=query&view=details&search_constraint=terms&query=GO:0005764) | lysosome | | [14](../../../../../../../../javascript/ReverseDisplay('GO/0005764')) | 0.04% |
| [GO:0005768](http://amigo.geneontology.org/cgi-bin/amigo/go.cgi?action=query&view=details&search_constraint=terms&query=GO:0005768) | endosome | | [28](../../../../../../../../javascript/ReverseDisplay('GO/0005768')) | 0.09% |
| [GO:0005773](http://amigo.geneontology.org/cgi-bin/amigo/go.cgi?action=query&view=details&search_constraint=terms&query=GO:0005773) | vacuole | | [44](../../../../../../../../javascript/ReverseDisplay('GO/0005773')) | 0.14% |
| [GO:0005777](http://amigo.geneontology.org/cgi-bin/amigo/go.cgi?action=query&view=details&search_constraint=terms&query=GO:0005777) | peroxisome | | [8](../../../../../../../../javascript/ReverseDisplay('GO/0005777')) | 0.03% |
| [GO:0005783](http://amigo.geneontology.org/cgi-bin/amigo/go.cgi?action=query&view=details&search_constraint=terms&query=GO:0005783) | endoplasmic reticulum | | [50](../../../../../../../../javascript/ReverseDisplay('GO/0005783')) | 0.16% |
| [GO:0005794](http://amigo.geneontology.org/cgi-bin/amigo/go.cgi?action=query&view=details&search_constraint=terms&query=GO:0005794) | Golgi apparatus | | [27](../../../../../../../../javascript/ReverseDisplay('GO/0005794')) | 0.08% |
| [GO:0005811](http://amigo.geneontology.org/cgi-bin/amigo/go.cgi?action=query&view=details&search_constraint=terms&query=GO:0005811) | lipid particle | | [2](../../../../../../../../javascript/ReverseDisplay('GO/0005811')) | 0.01% |
| [GO:0005815](http://amigo.geneontology.org/cgi-bin/amigo/go.cgi?action=query&view=details&search_constraint=terms&query=GO:0005815) | microtubule organizing center | | [20](../../../../../../../../javascript/ReverseDisplay('GO/0005815')) | 0.06% |
| [GO:0005829](http://amigo.geneontology.org/cgi-bin/amigo/go.cgi?action=query&view=details&search_constraint=terms&query=GO:0005829) | cytosol | | [22](../../../../../../../../javascript/ReverseDisplay('GO/0005829')) | 0.07% |
| [GO:0005840](http://amigo.geneontology.org/cgi-bin/amigo/go.cgi?action=query&view=details&search_constraint=terms&query=GO:0005840) | ribosome | | [13](../../../../../../../../javascript/ReverseDisplay('GO/0005840')) | 0.04% |
| [GO:0005856](http://amigo.geneontology.org/cgi-bin/amigo/go.cgi?action=query&view=details&search_constraint=terms&query=GO:0005856) | cytoskeleton | | [108](../../../../../../../../javascript/ReverseDisplay('GO/0005856')) | 0.34% |
| [GO:0005886](http://amigo.geneontology.org/cgi-bin/amigo/go.cgi?action=query&view=details&search_constraint=terms&query=GO:0005886) | plasma membrane | | [78](../../../../../../../../javascript/ReverseDisplay('GO/0005886')) | 0.24% |
| [GO:0005929](http://amigo.geneontology.org/cgi-bin/amigo/go.cgi?action=query&view=details&search_constraint=terms&query=GO:0005929) | cilium | | [28](../../../../../../../../javascript/ReverseDisplay('GO/0005929')) | 0.09% |
| [GO:0005975](http://amigo.geneontology.org/cgi-bin/amigo/go.cgi?action=query&view=details&search_constraint=terms&query=GO:0005975) | carbohydrate metabolism | | [210](../../../../../../../../javascript/ReverseDisplay('GO/0005975')) | 0.66% |
| [GO:0005992](http://amigo.geneontology.org/cgi-bin/amigo/go.cgi?action=query&view=details&search_constraint=terms&query=GO:0005992) | trehalose biosynthetic process | | [1](../../../../../../../../javascript/ReverseDisplay('GO/0005992')) | 0.00% |
| [GO:0006091](http://amigo.geneontology.org/cgi-bin/amigo/go.cgi?action=query&view=details&search_constraint=terms&query=GO:0006091) | generation of precursor metabolites and energy | | [65](../../../../../../../../javascript/ReverseDisplay('GO/0006091')) | 0.20% |
| [GO:0006118](http://amigo.geneontology.org/cgi-bin/amigo/go.cgi?action=query&view=details&search_constraint=terms&query=GO:0006118) | electron transport | | [1](../../../../../../../../javascript/ReverseDisplay('GO/0006118')) | 0.00% |
| [GO:0006139](http://amigo.geneontology.org/cgi-bin/amigo/go.cgi?action=query&view=details&search_constraint=terms&query=GO:0006139) | nucleobase, nucleoside, nucleotide and nucleic acid metabolism | | [985](../../../../../../../../javascript/ReverseDisplay('GO/0006139')) | 3.09% |
| [GO:0006259](http://amigo.geneontology.org/cgi-bin/amigo/go.cgi?action=query&view=details&search_constraint=terms&query=GO:0006259) | DNA metabolism | | [254](../../../../../../../../javascript/ReverseDisplay('GO/0006259')) | 0.80% |
| [GO:0006284](http://amigo.geneontology.org/cgi-bin/amigo/go.cgi?action=query&view=details&search_constraint=terms&query=GO:0006284) | base-excision repair | | [8](../../../../../../../../javascript/ReverseDisplay('GO/0006284')) | 0.03% |
| [GO:0006351](http://amigo.geneontology.org/cgi-bin/amigo/go.cgi?action=query&view=details&search_constraint=terms&query=GO:0006351) | transcription, DNA-templated | | [184](../../../../../../../../javascript/ReverseDisplay('GO/0006351')) | 0.58% |
| [GO:0006355](http://amigo.geneontology.org/cgi-bin/amigo/go.cgi?action=query&view=details&search_constraint=terms&query=GO:0006355) | regulation of transcription, DNA-templated | | [152](../../../../../../../../javascript/ReverseDisplay('GO/0006355')) | 0.48% |
| [GO:0006412](http://amigo.geneontology.org/cgi-bin/amigo/go.cgi?action=query&view=details&search_constraint=terms&query=GO:0006412) | protein biosynthesis | | [92](../../../../../../../../javascript/ReverseDisplay('GO/0006412')) | 0.29% |
| [GO:0006464](http://amigo.geneontology.org/cgi-bin/amigo/go.cgi?action=query&view=details&search_constraint=terms&query=GO:0006464) | protein modification | | [433](../../../../../../../../javascript/ReverseDisplay('GO/0006464')) | 1.36% |
| [GO:0006511](http://amigo.geneontology.org/cgi-bin/amigo/go.cgi?action=query&view=details&search_constraint=terms&query=GO:0006511) | ubiquitin-dependent protein catabolic process | | [26](../../../../../../../../javascript/ReverseDisplay('GO/0006511')) | 0.08% |
| [GO:0006629](http://amigo.geneontology.org/cgi-bin/amigo/go.cgi?action=query&view=details&search_constraint=terms&query=GO:0006629) | lipid metabolic process | | [320](../../../../../../../../javascript/ReverseDisplay('GO/0006629')) | 1.01% |
| [GO:0006810](http://amigo.geneontology.org/cgi-bin/amigo/go.cgi?action=query&view=details&search_constraint=terms&query=GO:0006810) | transport | | [950](../../../../../../../../javascript/ReverseDisplay('GO/0006810')) | 2.98% |
| [GO:0006811](http://amigo.geneontology.org/cgi-bin/amigo/go.cgi?action=query&view=details&search_constraint=terms&query=GO:0006811) | ion transport | | [341](../../../../../../../../javascript/ReverseDisplay('GO/0006811')) | 1.07% |
| [GO:0006886](http://amigo.geneontology.org/cgi-bin/amigo/go.cgi?action=query&view=details&search_constraint=terms&query=GO:0006886) | intracellular protein transport | | [93](../../../../../../../../javascript/ReverseDisplay('GO/0006886')) | 0.29% |
| [GO:0006887](http://amigo.geneontology.org/cgi-bin/amigo/go.cgi?action=query&view=details&search_constraint=terms&query=GO:0006887) | exocytosis | | [36](../../../../../../../../javascript/ReverseDisplay('GO/0006887')) | 0.11% |
| [GO:0006950](http://amigo.geneontology.org/cgi-bin/amigo/go.cgi?action=query&view=details&search_constraint=terms&query=GO:0006950) | response to stress | | [535](../../../../../../../../javascript/ReverseDisplay('GO/0006950')) | 1.68% |
| [GO:0006996](http://amigo.geneontology.org/cgi-bin/amigo/go.cgi?action=query&view=details&search_constraint=terms&query=GO:0006996) | organelle organization and biogenesis | | [619](../../../../../../../../javascript/ReverseDisplay('GO/0006996')) | 1.94% |
| [GO:0007005](http://amigo.geneontology.org/cgi-bin/amigo/go.cgi?action=query&view=details&search_constraint=terms&query=GO:0007005) | mitochondrion organization and biogenesis | | [78](../../../../../../../../javascript/ReverseDisplay('GO/0007005')) | 0.24% |
| [GO:0007010](http://amigo.geneontology.org/cgi-bin/amigo/go.cgi?action=query&view=details&search_constraint=terms&query=GO:0007010) | cytoskeleton organization and biogenesis | | [158](../../../../../../../../javascript/ReverseDisplay('GO/0007010')) | 0.50% |
| [GO:0007028](http://amigo.geneontology.org/cgi-bin/amigo/go.cgi?action=query&view=details&search_constraint=terms&query=GO:0007028) | cytoplasm organization and biogenesis | | [11](../../../../../../../../javascript/ReverseDisplay('GO/0007028')) | 0.03% |
| [GO:0007049](http://amigo.geneontology.org/cgi-bin/amigo/go.cgi?action=query&view=details&search_constraint=terms&query=GO:0007049) | cell cycle | | [321](../../../../../../../../javascript/ReverseDisplay('GO/0007049')) | 1.01% |
| [GO:0007050](http://amigo.geneontology.org/cgi-bin/amigo/go.cgi?action=query&view=details&search_constraint=terms&query=GO:0007050) | cell cycle arrest | | [6](../../../../../../../../javascript/ReverseDisplay('GO/0007050')) | 0.02% |
| [GO:0007154](http://amigo.geneontology.org/cgi-bin/amigo/go.cgi?action=query&view=details&search_constraint=terms&query=GO:0007154) | cell communication | | [630](../../../../../../../../javascript/ReverseDisplay('GO/0007154')) | 1.98% |
| [GO:0007165](http://amigo.geneontology.org/cgi-bin/amigo/go.cgi?action=query&view=details&search_constraint=terms&query=GO:0007165) | signal transduction | | [501](../../../../../../../../javascript/ReverseDisplay('GO/0007165')) | 1.57% |
| [GO:0007267](http://amigo.geneontology.org/cgi-bin/amigo/go.cgi?action=query&view=details&search_constraint=terms&query=GO:0007267) | cell-cell signaling | | [98](../../../../../../../../javascript/ReverseDisplay('GO/0007267')) | 0.31% |
| [GO:0007275](http://amigo.geneontology.org/cgi-bin/amigo/go.cgi?action=query&view=details&search_constraint=terms&query=GO:0007275) | multicellular organism development | | [1191](../../../../../../../../javascript/ReverseDisplay('GO/0007275')) | 3.74% |
| [GO:0007610](http://amigo.geneontology.org/cgi-bin/amigo/go.cgi?action=query&view=details&search_constraint=terms&query=GO:0007610) | behavior | | [69](../../../../../../../../javascript/ReverseDisplay('GO/0007610')) | 0.22% |
| [GO:0008037](http://amigo.geneontology.org/cgi-bin/amigo/go.cgi?action=query&view=details&search_constraint=terms&query=GO:0008037) | cell recognition | | [8](../../../../../../../../javascript/ReverseDisplay('GO/0008037')) | 0.03% |
| [GO:0008092](http://amigo.geneontology.org/cgi-bin/amigo/go.cgi?action=query&view=details&search_constraint=terms&query=GO:0008092) | cytoskeletal protein binding | | [28](../../../../../../../../javascript/ReverseDisplay('GO/0008092')) | 0.09% |
| [GO:0008135](http://amigo.geneontology.org/cgi-bin/amigo/go.cgi?action=query&view=details&search_constraint=terms&query=GO:0008135) | translation factor activity, nucleic acid binding | | [6](../../../../../../../../javascript/ReverseDisplay('GO/0008135')) | 0.02% |
| [GO:0008152](http://amigo.geneontology.org/cgi-bin/amigo/go.cgi?action=query&view=details&search_constraint=terms&query=GO:0008152) | metabolism | | [3077](../../../../../../../../javascript/ReverseDisplay('GO/0008152')) | 9.66% |
| [GO:0008219](http://amigo.geneontology.org/cgi-bin/amigo/go.cgi?action=query&view=details&search_constraint=terms&query=GO:0008219) | cell death | | [165](../../../../../../../../javascript/ReverseDisplay('GO/0008219')) | 0.52% |
| [GO:0008233](http://amigo.geneontology.org/cgi-bin/amigo/go.cgi?action=query&view=details&search_constraint=terms&query=GO:0008233) | peptidase activity | | [40](../../../../../../../../javascript/ReverseDisplay('GO/0008233')) | 0.13% |
| [GO:0008272](http://amigo.geneontology.org/cgi-bin/amigo/go.cgi?action=query&view=details&search_constraint=terms&query=GO:0008272) | sulfate transport | | [2](../../../../../../../../javascript/ReverseDisplay('GO/0008272')) | 0.01% |
| [GO:0008283](http://amigo.geneontology.org/cgi-bin/amigo/go.cgi?action=query&view=details&search_constraint=terms&query=GO:0008283) | cell proliferation | | [77](../../../../../../../../javascript/ReverseDisplay('GO/0008283')) | 0.24% |
| [GO:0008289](http://amigo.geneontology.org/cgi-bin/amigo/go.cgi?action=query&view=details&search_constraint=terms&query=GO:0008289) | lipid binding | | [40](../../../../../../../../javascript/ReverseDisplay('GO/0008289')) | 0.13% |
| [GO:0009056](http://amigo.geneontology.org/cgi-bin/amigo/go.cgi?action=query&view=details&search_constraint=terms&query=GO:0009056) | catabolism | | [458](../../../../../../../../javascript/ReverseDisplay('GO/0009056')) | 1.44% |
| [GO:0009058](http://amigo.geneontology.org/cgi-bin/amigo/go.cgi?action=query&view=details&search_constraint=terms&query=GO:0009058) | biosynthesis | | [1055](../../../../../../../../javascript/ReverseDisplay('GO/0009058')) | 3.31% |
| [GO:0009112](http://amigo.geneontology.org/cgi-bin/amigo/go.cgi?action=query&view=details&search_constraint=terms&query=GO:0009112) | nucleobase metabolic process | | [21](../../../../../../../../javascript/ReverseDisplay('GO/0009112')) | 0.07% |
| [GO:0009266](http://amigo.geneontology.org/cgi-bin/amigo/go.cgi?action=query&view=details&search_constraint=terms&query=GO:0009266) | response to temperature stimulus | | [24](../../../../../../../../javascript/ReverseDisplay('GO/0009266')) | 0.08% |
| [GO:0009409](http://amigo.geneontology.org/cgi-bin/amigo/go.cgi?action=query&view=details&search_constraint=terms&query=GO:0009409) | response to cold | | [8](../../../../../../../../javascript/ReverseDisplay('GO/0009409')) | 0.03% |
| [GO:0009416](http://amigo.geneontology.org/cgi-bin/amigo/go.cgi?action=query&view=details&search_constraint=terms&query=GO:0009416) | response to light stimulus | | [76](../../../../../../../../javascript/ReverseDisplay('GO/0009416')) | 0.24% |
| [GO:0009517](http://amigo.geneontology.org/cgi-bin/amigo/go.cgi?action=query&view=details&search_constraint=terms&query=GO:0009517) | PSII associated light-harvesting complex II | | [1](../../../../../../../../javascript/ReverseDisplay('GO/0009517')) | 0.00% |
| [GO:0009521](http://amigo.geneontology.org/cgi-bin/amigo/go.cgi?action=query&view=details&search_constraint=terms&query=GO:0009521) | photosystem | | [12](../../../../../../../../javascript/ReverseDisplay('GO/0009521')) | 0.04% |
| [GO:0009536](http://amigo.geneontology.org/cgi-bin/amigo/go.cgi?action=query&view=details&search_constraint=terms&query=GO:0009536) | plastid | | [58](../../../../../../../../javascript/ReverseDisplay('GO/0009536')) | 0.18% |
| [GO:0009579](http://amigo.geneontology.org/cgi-bin/amigo/go.cgi?action=query&view=details&search_constraint=terms&query=GO:0009579) | thylakoid | | [30](../../../../../../../../javascript/ReverseDisplay('GO/0009579')) | 0.09% |
| [GO:0009605](http://amigo.geneontology.org/cgi-bin/amigo/go.cgi?action=query&view=details&search_constraint=terms&query=GO:0009605) | response to external stimulus | | [270](../../../../../../../../javascript/ReverseDisplay('GO/0009605')) | 0.85% |
| [GO:0009607](http://amigo.geneontology.org/cgi-bin/amigo/go.cgi?action=query&view=details&search_constraint=terms&query=GO:0009607) | response to biotic stimulus | | [115](../../../../../../../../javascript/ReverseDisplay('GO/0009607')) | 0.36% |
| [GO:0009628](http://amigo.geneontology.org/cgi-bin/amigo/go.cgi?action=query&view=details&search_constraint=terms&query=GO:0009628) | response to abiotic stimulus | | [198](../../../../../../../../javascript/ReverseDisplay('GO/0009628')) | 0.62% |
| [GO:0009637](http://amigo.geneontology.org/cgi-bin/amigo/go.cgi?action=query&view=details&search_constraint=terms&query=GO:0009637) | response to blu light | | [5](../../../../../../../../javascript/ReverseDisplay('GO/0009637')) | 0.02% |
| [GO:0009640](http://amigo.geneontology.org/cgi-bin/amigo/go.cgi?action=query&view=details&search_constraint=terms&query=GO:0009640) | photomorphogenesis | | [5](../../../../../../../../javascript/ReverseDisplay('GO/0009640')) | 0.02% |
| [GO:0009642](http://amigo.geneontology.org/cgi-bin/amigo/go.cgi?action=query&view=details&search_constraint=terms&query=GO:0009642) | response to light intensity | | [14](../../../../../../../../javascript/ReverseDisplay('GO/0009642')) | 0.04% |
| [GO:0009653](http://amigo.geneontology.org/cgi-bin/amigo/go.cgi?action=query&view=details&search_constraint=terms&query=GO:0009653) | morphogenesis | | [498](../../../../../../../../javascript/ReverseDisplay('GO/0009653')) | 1.56% |
| [GO:0009698](http://amigo.geneontology.org/cgi-bin/amigo/go.cgi?action=query&view=details&search_constraint=terms&query=GO:0009698) | phenylpropanoid metabolic process | | [31](../../../../../../../../javascript/ReverseDisplay('GO/0009698')) | 0.10% |
| [GO:0009719](http://amigo.geneontology.org/cgi-bin/amigo/go.cgi?action=query&view=details&search_constraint=terms&query=GO:0009719) | response to endogenous stimulus | | [184](../../../../../../../../javascript/ReverseDisplay('GO/0009719')) | 0.58% |
| [GO:0009725](http://amigo.geneontology.org/cgi-bin/amigo/go.cgi?action=query&view=details&search_constraint=terms&query=GO:0009725) | response to hormone | | [104](../../../../../../../../javascript/ReverseDisplay('GO/0009725')) | 0.33% |
| [GO:0009790](http://amigo.geneontology.org/cgi-bin/amigo/go.cgi?action=query&view=details&search_constraint=terms&query=GO:0009790) | embryonic development | | [155](../../../../../../../../javascript/ReverseDisplay('GO/0009790')) | 0.49% |
| [GO:0009793](http://amigo.geneontology.org/cgi-bin/amigo/go.cgi?action=query&view=details&search_constraint=terms&query=GO:0009793) | embryo development ending in seed dormancy | | [13](../../../../../../../../javascript/ReverseDisplay('GO/0009793')) | 0.04% |
| [GO:0009819](http://amigo.geneontology.org/cgi-bin/amigo/go.cgi?action=query&view=details&search_constraint=terms&query=GO:0009819) | drought recovery | | [1](../../../../../../../../javascript/ReverseDisplay('GO/0009819')) | 0.00% |
| [GO:0009866](http://amigo.geneontology.org/cgi-bin/amigo/go.cgi?action=query&view=details&search_constraint=terms&query=GO:0009866) | induced systemic resistance, ethylene mediated signaling pathway | | [1](../../../../../../../../javascript/ReverseDisplay('GO/0009866')) | 0.00% |
| [GO:0010011](http://amigo.geneontology.org/cgi-bin/amigo/go.cgi?action=query&view=details&search_constraint=terms&query=GO:0010011) | auxin binding | | [1](../../../../../../../../javascript/ReverseDisplay('GO/0010011')) | 0.00% |
| [GO:0010114](http://amigo.geneontology.org/cgi-bin/amigo/go.cgi?action=query&view=details&search_constraint=terms&query=GO:0010114) | response to red light | | [5](../../../../../../../../javascript/ReverseDisplay('GO/0010114')) | 0.02% |
| [GO:0015031](http://amigo.geneontology.org/cgi-bin/amigo/go.cgi?action=query&view=details&search_constraint=terms&query=GO:0015031) | protein transport | | [141](../../../../../../../../javascript/ReverseDisplay('GO/0015031')) | 0.44% |
| [GO:0015693](http://amigo.geneontology.org/cgi-bin/amigo/go.cgi?action=query&view=details&search_constraint=terms&query=GO:0015693) | magnesium ion transport | | [1](../../../../../../../../javascript/ReverseDisplay('GO/0015693')) | 0.00% |
| [GO:0015986](http://amigo.geneontology.org/cgi-bin/amigo/go.cgi?action=query&view=details&search_constraint=terms&query=GO:0015986) | ATP synthesis coupled proton transport. | | [3](../../../../../../../../javascript/ReverseDisplay('GO/0015986')) | 0.01% |
| [GO:0016032](http://amigo.geneontology.org/cgi-bin/amigo/go.cgi?action=query&view=details&search_constraint=terms&query=GO:0016032) | viral life cycle | | [70](../../../../../../../../javascript/ReverseDisplay('GO/0016032')) | 0.22% |
| [GO:0016043](http://amigo.geneontology.org/cgi-bin/amigo/go.cgi?action=query&view=details&search_constraint=terms&query=GO:0016043) | cell organization and biogenesis | | [1312](../../../../../../../../javascript/ReverseDisplay('GO/0016043')) | 4.12% |
| [GO:0016049](http://amigo.geneontology.org/cgi-bin/amigo/go.cgi?action=query&view=details&search_constraint=terms&query=GO:0016049) | cell growth | | [43](../../../../../../../../javascript/ReverseDisplay('GO/0016049')) | 0.14% |
| [GO:0016114](http://amigo.geneontology.org/cgi-bin/amigo/go.cgi?action=query&view=details&search_constraint=terms&query=GO:0016114) | terpenoid biosynthetic process | | [32](../../../../../../../../javascript/ReverseDisplay('GO/0016114')) | 0.10% |
| [GO:0016137](http://amigo.geneontology.org/cgi-bin/amigo/go.cgi?action=query&view=details&search_constraint=terms&query=GO:0016137) | glycoside metabolic process | | [9](../../../../../../../../javascript/ReverseDisplay('GO/0016137')) | 0.03% |
| [GO:0016192](http://amigo.geneontology.org/cgi-bin/amigo/go.cgi?action=query&view=details&search_constraint=terms&query=GO:0016192) | vesicle-mediated transport | | [165](../../../../../../../../javascript/ReverseDisplay('GO/0016192')) | 0.52% |
| [GO:0016209](http://amigo.geneontology.org/cgi-bin/amigo/go.cgi?action=query&view=details&search_constraint=terms&query=GO:0016209) | antioxidant activity | | [14](../../../../../../../../javascript/ReverseDisplay('GO/0016209')) | 0.04% |
| [GO:0016301](http://amigo.geneontology.org/cgi-bin/amigo/go.cgi?action=query&view=details&search_constraint=terms&query=GO:0016301) | kinase activity | | [141](../../../../../../../../javascript/ReverseDisplay('GO/0016301')) | 0.44% |
| [GO:0016491](http://amigo.geneontology.org/cgi-bin/amigo/go.cgi?action=query&view=details&search_constraint=terms&query=GO:0016491) | oxidoreductase activity | | [498](../../../../../../../../javascript/ReverseDisplay('GO/0016491')) | 1.56% |
| [GO:0016567](http://amigo.geneontology.org/cgi-bin/amigo/go.cgi?action=query&view=details&search_constraint=terms&query=GO:0016567) | protein ubiquitination | | [43](../../../../../../../../javascript/ReverseDisplay('GO/0016567')) | 0.14% |
| [GO:0016740](http://amigo.geneontology.org/cgi-bin/amigo/go.cgi?action=query&view=details&search_constraint=terms&query=GO:0016740) | transferase activity | | [740](../../../../../../../../javascript/ReverseDisplay('GO/0016740')) | 2.32% |
| [GO:0016787](http://amigo.geneontology.org/cgi-bin/amigo/go.cgi?action=query&view=details&search_constraint=terms&query=GO:0016787) | hydrolase activity | | [546](../../../../../../../../javascript/ReverseDisplay('GO/0016787')) | 1.71% |
| [GO:0019538](http://amigo.geneontology.org/cgi-bin/amigo/go.cgi?action=query&view=details&search_constraint=terms&query=GO:0019538) | protein metabolism | | [669](../../../../../../../../javascript/ReverseDisplay('GO/0019538')) | 2.10% |
| [GO:0019725](http://amigo.geneontology.org/cgi-bin/amigo/go.cgi?action=query&view=details&search_constraint=terms&query=GO:0019725) | cell homeostasis | | [81](../../../../../../../../javascript/ReverseDisplay('GO/0019725')) | 0.25% |
| [GO:0019748](http://amigo.geneontology.org/cgi-bin/amigo/go.cgi?action=query&view=details&search_constraint=terms&query=GO:0019748) | secondary metabolism | | [80](../../../../../../../../javascript/ReverseDisplay('GO/0019748')) | 0.25% |
| [GO:0019825](http://amigo.geneontology.org/cgi-bin/amigo/go.cgi?action=query&view=details&search_constraint=terms&query=GO:0019825) | oxygen binding | | [1](../../../../../../../../javascript/ReverseDisplay('GO/0019825')) | 0.00% |
| [GO:0022414](http://amigo.geneontology.org/cgi-bin/amigo/go.cgi?action=query&view=details&search_constraint=terms&query=GO:0022414) | reproductive process | | [429](../../../../../../../../javascript/ReverseDisplay('GO/0022414')) | 1.35% |
| [GO:0030154](http://amigo.geneontology.org/cgi-bin/amigo/go.cgi?action=query&view=details&search_constraint=terms&query=GO:0030154) | cell differentiation | | [550](../../../../../../../../javascript/ReverseDisplay('GO/0030154')) | 1.73% |
| [GO:0030234](http://amigo.geneontology.org/cgi-bin/amigo/go.cgi?action=query&view=details&search_constraint=terms&query=GO:0030234) | enzyme regulator activity | | [67](../../../../../../../../javascript/ReverseDisplay('GO/0030234')) | 0.21% |
| [GO:0030246](http://amigo.geneontology.org/cgi-bin/amigo/go.cgi?action=query&view=details&search_constraint=terms&query=GO:0030246) | carbohydrate binding | | [12](../../../../../../../../javascript/ReverseDisplay('GO/0030246')) | 0.04% |
| [GO:0030312](http://amigo.geneontology.org/cgi-bin/amigo/go.cgi?action=query&view=details&search_constraint=terms&query=GO:0030312) | external encapsulating structure | | [11](../../../../../../../../javascript/ReverseDisplay('GO/0030312')) | 0.03% |
| [GO:0030313](http://amigo.geneontology.org/cgi-bin/amigo/go.cgi?action=query&view=details&search_constraint=terms&query=GO:0030313) | cell envelope | | [3](../../../../../../../../javascript/ReverseDisplay('GO/0030313')) | 0.01% |
| [GO:0031047](http://amigo.geneontology.org/cgi-bin/amigo/go.cgi?action=query&view=details&search_constraint=terms&query=GO:0031047) | gene silencing by RNA | | [35](../../../../../../../../javascript/ReverseDisplay('GO/0031047')) | 0.11% |
| [GO:0032880](http://amigo.geneontology.org/cgi-bin/amigo/go.cgi?action=query&view=details&search_constraint=terms&query=GO:0032880) | regulation of protein location | | [85](../../../../../../../../javascript/ReverseDisplay('GO/0032880')) | 0.27% |
| [GO:0040007](http://amigo.geneontology.org/cgi-bin/amigo/go.cgi?action=query&view=details&search_constraint=terms&query=GO:0040007) | growth | | [136](../../../../../../../../javascript/ReverseDisplay('GO/0040007')) | 0.43% |
| [GO:0040029](http://amigo.geneontology.org/cgi-bin/amigo/go.cgi?action=query&view=details&search_constraint=terms&query=GO:0040029) | regulation of gene expression, epigenetic | | [74](../../../../../../../../javascript/ReverseDisplay('GO/0040029')) | 0.23% |
| [GO:0042633](http://amigo.geneontology.org/cgi-bin/amigo/go.cgi?action=query&view=details&search_constraint=terms&query=GO:0042633) | cellular response to water deprivation | | [7](../../../../../../../../javascript/ReverseDisplay('GO/0042633')) | 0.02% |
| [GO:0043631](http://amigo.geneontology.org/cgi-bin/amigo/go.cgi?action=query&view=details&search_constraint=terms&query=GO:0043631) | RNA polyadenylation | | [7](../../../../../../../../javascript/ReverseDisplay('GO/0043631')) | 0.02% |
| [GO:0044248](http://amigo.geneontology.org/cgi-bin/amigo/go.cgi?action=query&view=details&search_constraint=terms&query=GO:0044248) | cellular catabolic process | | [370](../../../../../../../../javascript/ReverseDisplay('GO/0044248')) | 1.16% |
| [GO:0045182](http://amigo.geneontology.org/cgi-bin/amigo/go.cgi?action=query&view=details&search_constraint=terms&query=GO:0045182) | translation regulator activity | | [6](../../../../../../../../javascript/ReverseDisplay('GO/0045182')) | 0.02% |
| [GO:0045735](http://amigo.geneontology.org/cgi-bin/amigo/go.cgi?action=query&view=details&search_constraint=terms&query=GO:0045735) | nutrient reservoir activity | | [1](../../../../../../../../javascript/ReverseDisplay('GO/0045735')) | 0.00% |
| [GO:0046836](http://amigo.geneontology.org/cgi-bin/amigo/go.cgi?action=query&view=details&search_constraint=terms&query=GO:0046836) | glycolipid transport | | [1](../../../../../../../../javascript/ReverseDisplay('GO/0046836')) | 0.00% |
| [GO:0048518](http://amigo.geneontology.org/cgi-bin/amigo/go.cgi?action=query&view=details&search_constraint=terms&query=GO:0048518) | positive regulation of biological process | | [921](../../../../../../../../javascript/ReverseDisplay('GO/0048518')) | 2.89% |
| [GO:0048583](http://amigo.geneontology.org/cgi-bin/amigo/go.cgi?action=query&view=details&search_constraint=terms&query=GO:0048583) | regulation of response to stimulus | | [541](../../../../../../../../javascript/ReverseDisplay('GO/0048583')) | 1.70% |
| [GO:0050826](http://amigo.geneontology.org/cgi-bin/amigo/go.cgi?action=query&view=details&search_constraint=terms&query=GO:0050826) | response to freezing | | [2](../../../../../../../../javascript/ReverseDisplay('GO/0050826')) | 0.01% |
| [GO:0051119](http://amigo.geneontology.org/cgi-bin/amigo/go.cgi?action=query&view=details&search_constraint=terms&query=GO:0051119) | sugar transmembrane transporter activity | | [26](../../../../../../../../javascript/ReverseDisplay('GO/0051119')) | 0.08% |
| [GO:0055114](http://amigo.geneontology.org/cgi-bin/amigo/go.cgi?action=query&view=details&search_constraint=terms&query=GO:0055114) | oxidation-reduction process | | [73](../../../../../../../../javascript/ReverseDisplay('GO/0055114')) | 0.23% |
| [GO:0060918](http://amigo.geneontology.org/cgi-bin/amigo/go.cgi?action=query&view=details&search_constraint=terms&query=GO:0060918) | auxin transport | | [9](../../../../../../../../javascript/ReverseDisplay('GO/0060918')) | 0.03% |
| [GO:0070417](http://amigo.geneontology.org/cgi-bin/amigo/go.cgi?action=query&view=details&search_constraint=terms&query=GO:0070417) | cellular response to cold | | [2](../../../../../../../../javascript/ReverseDisplay('GO/0070417')) | 0.01% |
| [GO:0071482](http://amigo.geneontology.org/cgi-bin/amigo/go.cgi?action=query&view=details&search_constraint=terms&query=GO:0071482) | cellular response to light stimulus | | [20](../../../../../../../../javascript/ReverseDisplay('GO/0071482')) | 0.06% |
| [GO:0080032](http://amigo.geneontology.org/cgi-bin/amigo/go.cgi?action=query&view=details&search_constraint=terms&query=GO:0080032) | methyl jasmonate esterase activity | | [1](../../../../../../../../javascript/ReverseDisplay('GO/0080032')) | 0.00% |
| [GO:0080123](http://amigo.geneontology.org/cgi-bin/amigo/go.cgi?action=query&view=details&search_constraint=terms&query=GO:0080123) | jasmonate-amino synthetase activity | | [1](../../../../../../../../javascript/ReverseDisplay('GO/0080123')) | 0.00% |
| [GO:1901656](http://amigo.geneontology.org/cgi-bin/amigo/go.cgi?action=query&view=details&search_constraint=terms&query=GO:1901656) | glycoside transport | | [3](../../../../../../../../javascript/ReverseDisplay('GO/1901656')) | 0.01% |
| [GO:1903416](http://amigo.geneontology.org/cgi-bin/amigo/go.cgi?action=query&view=details&search_constraint=terms&query=GO:1903416) | response to glycoside | | [1](../../../../../../../../javascript/ReverseDisplay('GO/1903416')) | 0.00% |
| **Total** | | 31839 | | 100.00% |


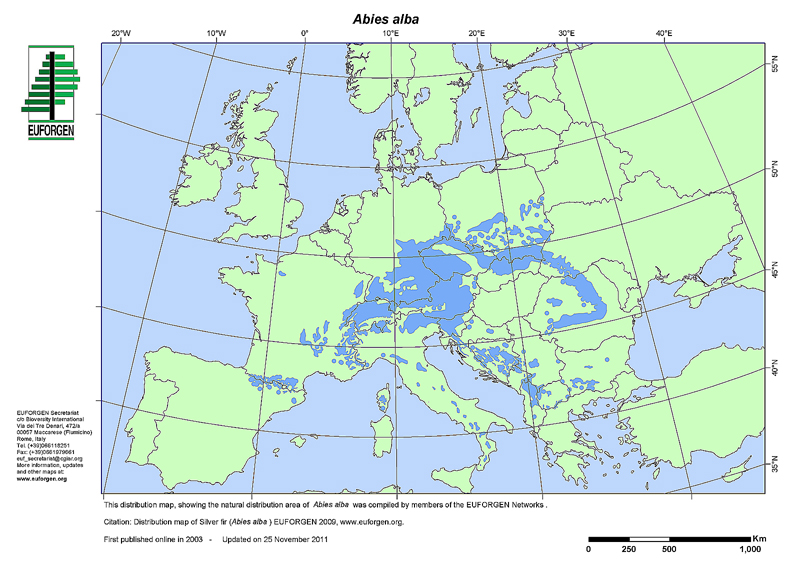


**FIGURE S1**. Distribution map of *A. alba* natural stands, compiled by the EUFORGEN Network members (EUFORGEN 2009).

#

**FIGURE S2.** (**A**) Location of the 19 sampled Swiss populations and tree AA_WSL01. Modified after Csilléry et al. (2018). (**B**) The log-likelihood from Structure runs with K = 2 to K=10. (**C**) Ancestry proportions of AA_WSL01 and the 19 genotyped Swiss populations for K=3 and K=4.

**FIGURE S3.** Plot produced with DNAdiff for the comparison between *A. alba* and *A. sibirica* chloroplasts (**A**) and *A. alba* and *A. koreana* chloroplasts (**B**).

|  |
| --- |

**FIGURE S4.** Boxplots of the distribution lengths of the genes, transcripts, exons and introns across the *Abies alba* high-quality genes and full-length genes (indicated as “full”). The distribution is log10 transformed.


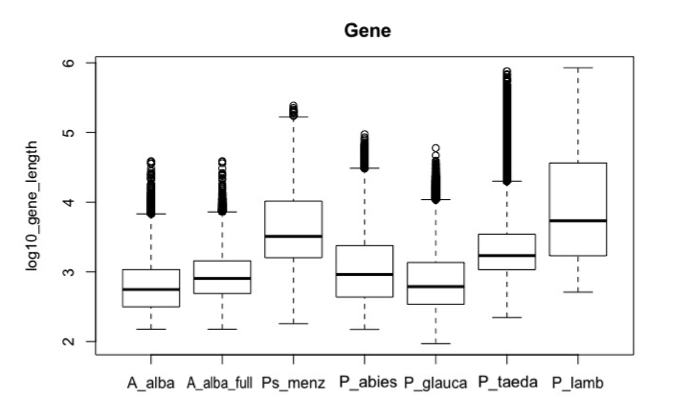


**A**


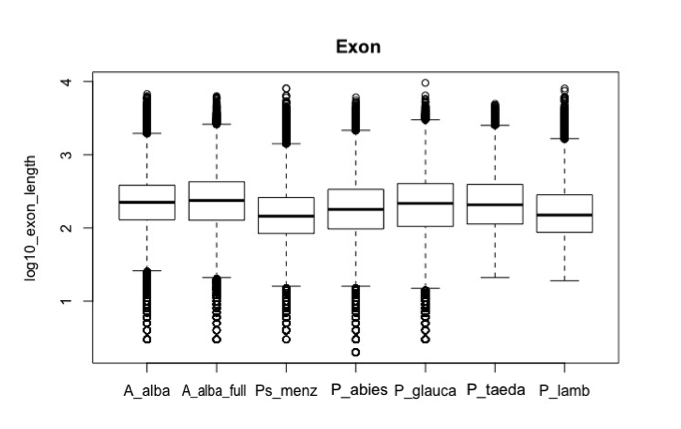


**B**


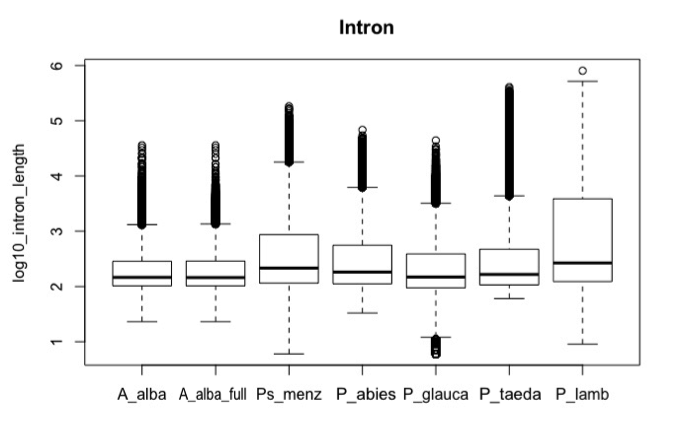


**C**

**FIGURE S5.** Boxplots of the distribution lengths of the genes (**A**), exons (**B**), and introns (**C**) across the *Abies alba* (A_alba) high-quality genes and full-length genes (indicated as “full”), *Pseudotsuga menziesii* (Ps_menz), *Picea abies* (P_abies), *Picea glauca* (P_glauca), *Pinus taeda* (P_taeda), *Pinus lambertiana* (P_lamb).


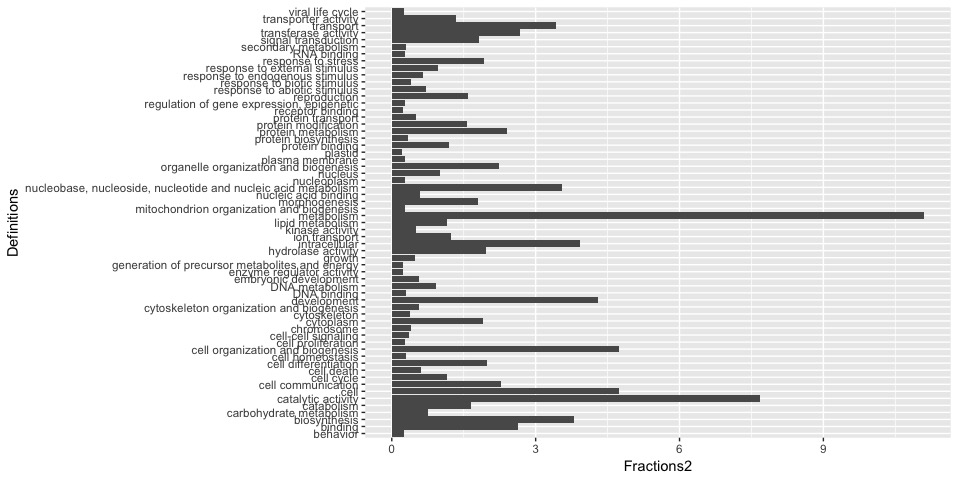


A


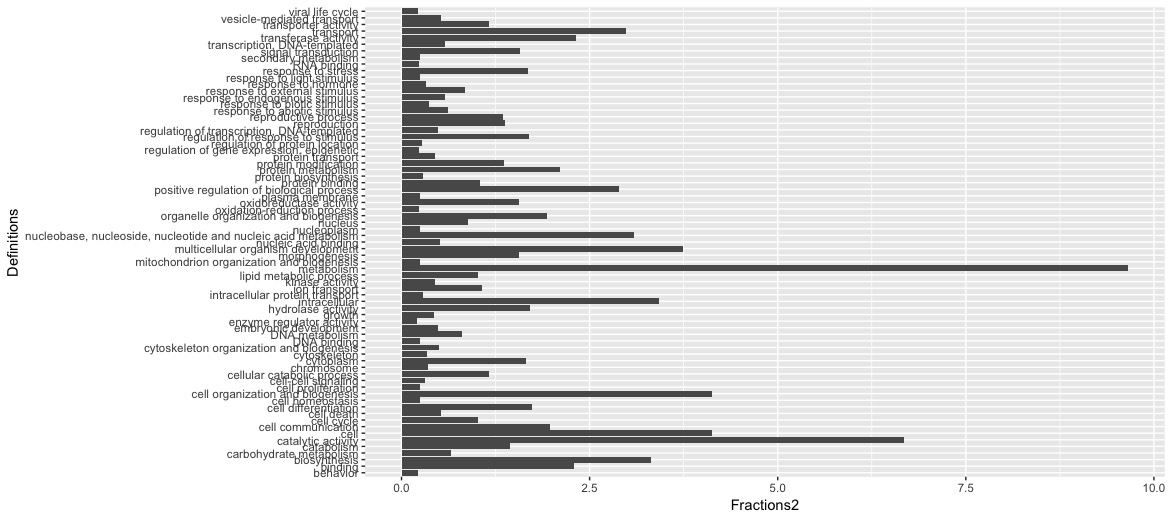


B

**Figure S6** Distribution of the most abundant Gene Ontology (GO) terms assigned to the *A. alba* genome using slim2 categories (**A**) and myclass2 categories (**B**). The percentage (fraction) of the term assigned in each category is represented only for values > 0.2%. All categories are given in Table S3, all count and percentages in Table S6.
